# Variation in the life history strategy of cells underlies tumor's functional diversity

Tao Li<sup>1,2,3,4</sup>, Jialin Liu<sup>2,4</sup>, Jing Feng<sup>1,2,3,4</sup>, Zhenzhen Liu<sup>2,4</sup>, Sixue Liu<sup>2,4</sup>, Minjie Zhang<sup>2,4</sup>, Yuezheng Zhang<sup>2,4</sup>, Yali Hou<sup>2,4</sup>, Dafei Wu<sup>2,4</sup>, Chunyan Li<sup>2,4</sup>, Young-Bin Chen<sup>5</sup>, Chung-I Wu<sup>2,6,7</sup>, Hua Chen<sup>2,4</sup> & Xuemei Lu<sup>1,2,3,4,\*</sup>

<sup>1</sup>State Key Laboratory of Genetic Resources and Evolution, Kunming Institute of Zoology, Chinese Academy of Science, Kunming 650223, China.

<sup>2</sup>CAS Key Laboratory of Genomic and Precision Medicine, Beijing Institute of Genomics, Chinese Academy of Sciences, Beijing 100101, China.

<sup>3</sup>Center for Excellence in Animal Evolution and Genetics, Chinese Academy of Sciences, Kunming 650223, China.

<sup>4</sup>University of Chinese Academy of Sciences, Beijing 100049, China.

<sup>5</sup>Key Laboratory of Animal Models and Human Disease Mechanisms of the Chinese Academy of Sciences and Yunnan Province, Kunming Institute of Zoology, Kunming 650223, China.

<sup>6</sup>State Key Laboratory of Biocontrol, College of Ecology and Evolution, Sun Yat-Sen University, Guangzhou 510275, China.

<sup>7</sup>Department of Ecology and Evolution, University of Chicago, Chicago, IL 60637, USA.

\*e-mail: xuemeilu@mail.kiz.ac.cn.

## Abstract

Classical *r*- vs. *K*-selection theory describes the trade-offs between high reproductive output and competitiveness and guides research in evolutionary ecology<sup>1-5</sup>. While its impact has waned in the recent past, cancer evolution may rekindle it<sup>6-10</sup>. Indeed, solid tumors are an ideal theater for *r*- and *K*-selection and, hence, a good testing ground for ideas on life-history strategy evolution<sup>11,12</sup>. In this study, we impose *r*- or *K*-selection on HeLa cells to obtain strongly proliferative *r* cells and highly competitive *K* cells. RNA-seq analysis indicates that phenotypic trade-offs in *r* and *K* cells are associated with distinct patterns of expression of genes involved in the cell cycle, adhesion, apoptosis, and contact inhibition. Both empirical observations and simulations based on an ecological competition model show that the trade-off between cell proliferation and competitiveness can evolve adaptively and rapidly in naïve cell lines. It is conceivable that the contrasting selective pressure may operate in a realistic ecological setting of actual tumors. When the *r* and *K* cells are mixed *in vitro*, they exhibit strikingly different spatial and temporal distributions in the resultant cultures. Thanks to this niche separation, the fitness of the entire tumor increases. Our analyses of life-history trade-offs are pertinent to evolutionary ecology as well as cancer biology.

## 1 Introduction

2 Diverse environmental conditions act on populations and species, leading to selection-driven  
3 emergence of niche-specific adaptive phenotypes and preventing the emergence of a  
4 “superorganism”<sup>13</sup>. Such a superorganism, often dubbed “Darwinian demon,” would produce  
5 very large numbers of offspring and live indefinitely<sup>14</sup>. Existence of such entities is contrary to  
6 life history theory and empirical observation. Indeed, evolution of adaptive traits is typically  
7 restricted by fitness constraints<sup>15</sup>. These constraints often take the form of trade-offs whereby a  
8 life history trait can affect different components of fitness in opposite directions. Thus,  
9 directional evolution of such a trait would increase some measures of organismal performance  
10 at the expense of others<sup>16</sup>. The trade-offs are fundamentally shaped by the way the organism  
11 allocates its energy and resources between reproduction and survival<sup>17,18</sup>. Due to the  
12 complexity of life-history traits and environmental variables, empirical measurement of  
13 plausible trade-offs and their driving forces remains difficult<sup>15</sup>.

14 In contrast to natural organisms, cancers appear to be exempt from all constraints during the  
15 process of somatic cell evolution. A series of biological features, the so-called “hallmarks of  
16 cancer”, are characterized by fast proliferation, resistance to low oxygen and crowded  
17 environment, and the ability to recruit blood vessels and escape the immune system<sup>19</sup>. How  
18 can all aspects of fitness be maximized in cancers? Perhaps heterogeneity within tumors  
19 enables several cell lineages to adopt a variety of characteristics and colonize different niches  
20 in a changing environment<sup>12,20–25</sup>. The internal and external microenvironments that cancer  
21 cells are confronted with in a multicellular organism are akin to complex ecosystems<sup>25–34</sup>.  
22 Trade-offs between cell proliferation and survival may apply to such cancer cell  
23 populations<sup>25,33,35</sup>. Both rapid cell proliferation and stable survival strategies must complement  
24 each other to achieve high fitness of a tumor as a whole<sup>12</sup>. Therefore, cancer cell populations  
25 can be used to test selection pressures and adaptive strategies that govern the trade-off between  
26 increasing proliferation and survival, and the ecological mechanisms that underlie these trade-  
27 offs in heterogenous populations.

28 An important and well-defined environmental variable governing evolutionary change is  
29 population density relative to essential resources<sup>36</sup>. The theory of density-dependent natural  
30 selection, often called *r*- and *K*-selection, states that at extreme population densities evolution  
31 produces alternative strategies<sup>37</sup>. The trade-offs are presumed to arise because the genotypes  
32 with the highest fitness at high population densities have low fitness at low density and vice-

33 versa<sup>15,38</sup>. The *r*-populations are selected for high intrinsic rate of growth (*r*) in environments  
34 where population density is low and resources are abundant but perform badly at high density.  
35 In contrast, *K*-populations, experiencing strong competition for limited resources under high  
36 density conditions, should evolve high intraspecific competitive ability and enhance their  
37 carrying capacity (*K*). *K*-selected populations do not have high growth rates because they are  
38 near the carrying capacity for their environment<sup>1,2,5,39,40</sup>.

39 In this study, we performed artificial selection for cell density on HeLa cell lines in order to  
40 amplify the diversity of cell growth within tumors. We asked whether selection under different  
41 density regimes modifies per capita growth rates and competitiveness as predicted by models  
42 that postulate a trade-off between *r*- and *K*-selection. To examine the phenotypic trade-offs at  
43 the molecular level, we carry out RNA-seq and explore the specific gene expression and  
44 pathway characteristics of *r* and *K* cells. The dynamics of density-dependent population growth  
45 in mixed populations change with the proportions of *r* and *K* cells within them. We model these  
46 dynamics and fit our models to empirical observations in order to quantify the interaction  
47 among the various trade-off phenotypes in a heterogenous population and their effect on fitness  
48 of whole tumors.

49

## 50 Results

### 51 Density-dependent selection and fitness changes of *r*- and *K*-selected cell 52 populations

53 The initial cell population (*IN* cells) was a single cell clone from a HeLa cell line. When the  
54 size of the population reached  $10^7$  cells, we divided the clone in two sub-populations. One sub-  
55 population was marked with eGFP (*IN\_G*) and the other with dsRed (*IN\_R*) through lentivirus  
56 transfection. Three *r*-selection replicates (using *IN\_G* cells) and three *K*-selection replicates  
57 (using *IN\_R* cells) were derived independently. After approximately 200 passages under *r*-  
58 selection (the low-density condition) and about 130 passages under *K*-selection (the high-  
59 density condition), we obtained six populations of *r*-selected (*r* cells) and six of *K*-selected cells  
60 (*K* cells). The density-dependent selection scheme is illustrated in Figure 1a.

61 To test whether the selected r and K cells are more adapted to their corresponding conditions  
62 than the ancestral IN cells, we pairwise co-cultured the three types of cells at high and low  
63 density. r cells become dominant within two passages (three days, Extended Data Figure 1a)  
64 in the r-IN mix, suggesting that the r cells have evolved higher fitness than IN cells under these  
65 conditions. Likewise, K cells rapidly take over the K-IN mixed population (in four days, two  
66 passages, Extended Data Figure 1b). Both r and K cells display better fitness than their  
67 counterpart in the r-K mix under corresponding selection conditions (Figure 1b and 1c). We  
68 thus successfully selected for alternative life histories in our experiment.

## 69 Density-dependent rates of population growth of r and K cells in 2D- and 3D- 70 growth environments

71 To explore the possibility that the r and K cells exhibit a trade-off in their density-dependent  
72 population growth, we first measured the growth rates of these cells in 2D *in vitro* systems at  
73 low and high density. Under low-density, r cells grow faster than K cells (Figure 1d). When  
74 the test was performed at high density, there is no significant difference between r and K cells,  
75 whereas growth rates of r-cell populations decrease remarkably compared to low density  
76 conditions (Figure 1d).

77 We next tested the difference between r and K cells in their density-dependent rates of  
78 population growth in 3D cellular environments. We quantified tumorigenicity by measuring  
79 colony growth and formation in a semi-solid agarose gel. r cells displayed a significantly higher  
80 rate of colony formation than K cells within seven days (Figure 1e). However, K-cell clones  
81 were significantly larger than r-cell colonies on day 21 (Figure 1f). The diameter of K-cell  
82 clones was 5 mm on average, while it was 0.5 mm for r-clones. This suggests K-cells have  
83 evolved to tolerate high density better than r-cells.

84 Xenograft mouse models were used to investigate the population growth rate of r and K  
85 cells *in vivo*. Cells were injected into the inguinal skin of BALB/c Nude mice. Tumor nodules  
86 were established in all xenografts in about two weeks. The mean growth rate of r-cell tumors  
87 was significantly higher than that of K-cell tumors *in vivo* (Figure 1g).



## 88 Trade-off between cell proliferation and survival in *r*- and *K*-cells

89 The net rate of population growth is determined by both cell death and birth rates. Using  
90 annexin-V and DAPI staining, reflecting cell death and the G0/G1 phase of the cell cycle, we  
91 measured the proportions of dead cells and distinguished the resting/quiescent (G0/G1) from  
92 total cells in the *r* and *K* populations at high and low density. Figure 2a shows that the  
93 proportion of G0/G1 phase cells is lower in the *r*- than in the *K*-cell populations, indicating that  
94 *r* cells proliferate relatively quickly at both low and high density. It also demonstrates that *K*  
95 cell birth rate does not increase at high density.

96 The *K* cell death rate is relatively stable under both conditions (Figure 2b). In contrast, the  
97 *r* cell death rate increases significantly under high compared to low density. The *r* cells also  
98 die more frequently at high density than *K* cells (Figure 2b). The high birth and death rates of  
99 *r* cells suggest that they have evolved to quickly produce offspring rather than to increase their  
100 survival, while *K* cells tend to ensure offspring quality rather than number. The high incidence  
101 of cell death leads to a decrease in growth rate of *r* cells at high density, and the effect of density  
102 in *r*-selected populations is mainly on cell death.

## 103 Transcriptome characteristics support a trade-off between cell proliferation and 104 survival in *r*- and *K*-cells

105 To find molecular characteristics that may be correlated with the phenotypic trade-offs in *r* and  
106 *K* cells, we carried out RNA-seq in 22 samples, including two replicates of initial cell  
107 populations, five *K* cell lines, five *r*-cell lines under routine cell culture conditions, and *r*- and  
108 *K*- replicate lines under high density stress. Multiple comparisons were performed among  
109 transcriptional profiles of cell lines across and within density conditions. Differentially  
110 expressed genes in these comparisons were identified using standard methods<sup>41,42</sup>. Figure 2c  
111 shows that *r* and IN cell populations cluster closely and differ from the *K*-cell populations under  
112 routine cell-culture conditions (at low density). We detect that 3161 genes show significant  
113 difference in gene expression (DEGs) between the *r* and *K* cells (with 1748 up- and 1413 down-  
114 regulated genes in *K* cells, Extended Data Table 1). Using the Functional Annotation Tool  
115 from the DAVID package, we found 25 pathways significantly enriched for these differentially  
116 expressed genes. The top three of these are the spliceosome, pathways involved in cancer, and  
117 ribosome biogenesis (Extended Data Table 2).

118 Genes from the same signaling pathway may increase or decrease its overall expression  
119 level, resulting in the enhancement or inhibition of related biological functions<sup>43-45</sup>. The top 20  
120 highly expressed pathways in K or r cells based on the GAGE (General Applicable Gene-set  
121 Enrichment for Pathway Analysis)<sup>46</sup> are listed in Figure 2d. The upregulated pathways in K  
122 cells include cell and focal adhesion, ErbB signaling, ECM-receptor interaction, phagosome,  
123 regulation of actin cytoskeleton, and Jak-STAT signaling. The cell cycle (upper panel in Figure  
124 2d), metabolism, and genetic information processing (such as ribosome biogenesis and mRNA  
125 surveillance) pathways are significantly highly expressed in r cells (Figure 2d).

126 We next detected the transcriptional difference in responding to density constraints between  
127 r and K cells. Dramatic change at the transcriptional level is found in r cells when they are  
128 grown at high density. The expression levels of 6373 genes are significantly different from low  
129 density (Extended Data Table 1), while the number of DEGs is 2278 in K cells (Extended Data  
130 Table 1). Compared to the gene expression profiles under low-density conditions, 1775 genes  
131 (859 genes up-regulated; 916 genes down-regulated) present the same trend of expression  
132 change in both r and K cells under high density. These are involved in metabolic and serial  
133 RNA related pathways. These results suggest that high culture density has a prominent effect  
134 on cell metabolism (Extended Data Table 3). In addition to these common changes, only 503  
135 (=2278-1775) genes respond to density change specifically in K cells. The number of genes  
136 (6373-1775=4598 genes) responding to the density change in r cells is approximately nine  
137 times larger than that, indicating that r cells are more sensitive and less stable at high density  
138 than K cells.

### 139 Underrepresentation of contact inhibition in K cells

140 The direct cellular response to cell density is contact inhibition which mediates cell growth and  
141 proliferation via interplay between growth signaling pathways and density constraints. Contact  
142 inhibition of proliferation is typically absent in cancer cells<sup>47</sup>. Both RNA-seq analysis and  
143 trypsinization assay showed that K cells are prone to form cell-cell adhesion at high density  
144 (Figure 2d and Extended Data Figure 6), implying a loss or decrease of contact inhibition<sup>48</sup>. In  
145 contrast, cell cycle arrest and the slower growth may still be triggered in r cells by signaling  
146 pathways that downregulate proliferation in a cell-density dependent manner<sup>49</sup>. One such  
147 pathway is the Hippo-YAP signaling pathway, which is largely responsible for inhibiting cell  
148 growth and controls organ size in many organisms<sup>50</sup>. The RNA\_seq results in this study show

149 that expression of YAP/TAZ is significantly upregulated in K cells, while the hippo-signaling  
150 pathway is overrepresented in gene expression comparison between r and K cells (Extended  
151 Data Table 2). In addition, the crosstalk among the hippo signaling and eight other pathways  
152 (including adherens junction, focal adhesion, tight junction, PI3K-Akt signaling, mTOR  
153 signaling, ErbB signaling, TGF-beta signaling, and Wnt signaling) constructs a regulation  
154 network associated with cell cycle, cell survival, cell proliferation, and apoptosis<sup>51-53</sup>. A gene  
155 cluster analysis shows that the r and K cells can be distinguished by the expression profile of  
156 DEGs involved in these nine signaling pathways (Extended Data Figure 2).

157 The expression of anti-apoptotic factors can be activated by the transport of  
158 dephosphorylated YAP into the cell nucleus<sup>52</sup>. In reacting to high cell density, activated  
159 LATS1/2 regulates phosphorylation of the coactivator YAP/TAZ, promoting cytoplasmic  
160 localization of YAP and leading to cell apoptosis and restriction of organ overgrowth<sup>54</sup>.  
161 Overexpression or hyperactivation of YAP/TAZ has been observed in many types of tumors,  
162 stimulating growth and proliferation<sup>55-57</sup>. We performed an immunofluorescence assay to  
163 identify the localization of YAP/TAZ in r and K cells under both low- and high-density  
164 conditions. The localization of YAP/TAZ in the cytoplasm and nuclei was observed in both r  
165 and K cells at low density (Extended Data Figure 3a). In contrast, the nuclear localization of  
166 YAP/TAZ is absent in r cells but is still maintained in K cells grown at high density (Figure  
167 3a). This suggests that YAP/TAZ phosphorylation is inhibited in K cells under high density,  
168 resulting in the loss of cell contact inhibition<sup>58</sup>. Consequently, cell apoptosis may be triggered  
169 by cytoplasmic localization of YAP in r cells but not in K cells as cell density increases.

170 In addition, Dlg-2 is a cell polarity gene in the hippo signaling pathway, regulating the  
171 inhibition of phosphorylated active YAP/TAZ proteins in the cytoplasm<sup>51,59</sup>. Our transcriptome  
172 analysis shows that expression of Dlg-2 is significantly higher in K cells at high than at low  
173 density (Extended Data document 1). We confirmed this by RT-PCR (Extended Data Figure  
174 3b). We carried out an siRNA assay to knock down the expression of Dlg-2 in K cells  
175 (Extended Data Figure 3c). The apoptosis rate of Dlg-2 knock-down K cells significantly  
176 increased at high density (Figure 3b), confirming that the high expression level of Dlg-2  
177 contributes to survival of K cells grown under these conditions.

## 178 Dynamics of density-dependent population growth and competitiveness of r and 179 K cells

### 180 **1) Empirical observations**

181 Population proportion changes, as well birth and death rates of r and K cells were measured in  
182 a co-culture assay. When r and K cells are co-cultured at high density, the proportion of r cells  
183 decreases over time (Figure 1c, Extended Data Figure 3) and the death incidence of r cells is  
184 significantly higher than of K cells (Figure 4a). The death rate and G0/G1 phase proportion  
185 among r cells in co-cultures are both significantly higher than when the r cells are cultured  
186 individually under crowded conditions (Figure 4a and 4b). Compared to r, K cells have a  
187 relatively stable incidence of death and proportion of cells in G0/G1 phase under co-culture or  
188 in individual cultures, although their death rate increases under co-culture (Figure 4a and 4b).  
189 These results show that the birth of r cells is restrained and cell death is accelerated when these  
190 two different types of cells are cultured together at high density, suggesting that they are in  
191 competition when they coexist.

192 Competition may result in niche separation among co-existing populations in an ecological  
193 community<sup>60</sup>. To examine this possibility, we carried out co-cultures where approximately  $10^6$   
194 r and K cells were well mixed at equal proportion and seeded in the centers of wells in six-well  
195 plates. Three replicate co-cultures were scanned every 72 hours. We observed that r and K cells  
196 in the co-culture assay tended to occupy different regions in a well. The r cells disperse to the  
197 periphery, while K cells grow and occupy the crowded central area (Figure 4c). This  
198 observation reveals an additional density-dependent difference in the phenotypes of r and K  
199 cells<sup>61,62</sup>.

### 200 **2) Simulation and parameter estimation**

201 To investigate the inter-population relationship between r and K cells, we adopt the Lotka-  
202 Volterra model which has been widely used to study population interaction<sup>63,64-54</sup>. Mixed  
203 populations were initiated in our computer simulations with different fractions of r and K cells  
204 (Materials and Methods), followed by 30 cell passages at high density. We compared the  
205 growth curves of r and K populations in the simulation to the empirical observations described  
206 in the previous section. Figure 4d shows that even when the initial proportion of r cells was  
207 highest (r:K=9:1) the extinction time of r cells in the simulation with no between-cell type

208 interaction ( $\alpha = \beta = 0$ ; no effect of one cell population on the other) is approximately five times  
209 longer than observed. Simulations reveal that the extinction time of the r cell population is  
210 shortened when  $\alpha$  is higher than  $\beta$  (Extended Data Figure 5). Comparing the growth curves  
211 from empirical observations (blue line in Figure 4d) and in simulations across values of  $\alpha$  and  $\beta$   
212 (green and red lines in Figure 4d), we find that the values of  $\alpha = 2.2$  and  $\beta = 0$  fit the data best  
213 (Figure 4d, Extended Data Table 4). Thus, we infer that there is an interaction between r and  
214 K cells and K cells influence r cell death.

## 215 Phenotypic diversity promotes cancer cell population growth

216 *In silico* -- To test whether the existence of phenotypic diversity and inter-population  
217 interaction promote total fitness, we first carried out stochastic simulations to compare the  
218 growth dynamics of r-K mixed populations to pure r- and K-cell assemblages. Unlike in the  
219 previous section, the current computational model considers space and density heterogeneity  
220 in the environment where the tumor cells grow, and the interaction of r and K cells in these  
221 conditions. The rates of cell division and death depend on local cell density. Due to the density  
222 effect, cells are able to divide and migrate only if there is sufficient nearby space. The  
223 simulation is described in detail in the Materials and Methods and Extended Data Figure 13.  
224 Figure 4c illustrates that *in silico* growth distribution of r and K cells in the mixed population  
225 is consistent with empirical observations (the upper panel of Figure 4c). Among-cell interaction  
226 and the density effect promote the re-localization of r and K cells, from well-mixed at the  
227 beginning of cell culture to a biased distribution with the entire occupation of the K cells in the  
228 middle and the outward spread of r cells (the bottom panel of Figure 4c). The mixed  
229 populations exhibit significantly higher rate of growth than the pure r- or K-cell populations  
230 (Figure 5a and 5b).

231 *In vivo* – Mouse xenografts initiated with r, K, and r-K mixed cells were weighed on the 34<sup>th</sup>  
232 day, followed by H & E staining. The necrotic and non-necrotic regions were distinguished  
233 using the gray threshold method. We observed a high incidence of death in the r-xenografts  
234 (Figure 5c) and a significantly higher proportion of non-necrotic cells the mixed xenografts  
235 (Figure 5d). Although average fresh weight of the r-xenografts is much larger than the fresh  
236 weight of K- and mixed xenografts (reflecting the higher r cell proliferation rate, Figure 5e),  
237 the mean weight of viable cells in the mixed xenografts is the highest. It indicates that the

238 existence of phenotypic trade-offs within a cell population is advantageous to cell viability and  
239 population growth.

240

## 241 Discussion

242 *r*- and *K*- selection theory predicts that natural selection increases density-dependent rates of  
243 population growth. This has been tested experimentally on specific model systems from  
244 bacteria and *Drosophila* to vertebrates accounting for life history details<sup>15,70–73</sup>. The notion of  
245 trade-offs in life-history evolution became a prominent feature of the theory and prompted a  
246 focus of theoreticians and field scientists both in ecology and evolutionary biology<sup>1,2,15,37,74</sup>.  
247 However, the heart of continuing controversy on the theory of *r*- and *K*-selection between  
248 theoreticians and field biologists is that many complex life-history characters of natural  
249 populations contradict theoretical expectations<sup>1,4,5</sup>. It is unrealistic to expect that a theory could  
250 account for all aspects of the natural environment and its impact on evolutionary processes in  
251 all organisms<sup>1,5</sup>. Thus, the only proper way to test the theoretical predictions is in controlled  
252 settings congruent with the assumptions of the simple models.

253 Tumorigenesis is an evolving and dynamic process where highly genetically and  
254 phenotypically heterogeneous neoplastic cell populations persist in challenging environments.  
255 In fact hallmarks of cancer cannot be acquired in all cancer cells all the time<sup>75</sup>. An important  
256 cell-to-cell phenotypic variability is determined by several exterior and interior constraints<sup>12,76–</sup>  
257 <sup>79</sup>. For instance, environments in tumors are both stable (but crowded, hypoxic, and nutrient-  
258 poor) in the interior, and fluctuating in nutrients, space, and interaction between the  
259 components in the microenvironment at the edge of the tumors<sup>80,81</sup>. The consequences of  
260 somatic cell evolution under complex environmental pressures parallel ecological processes in  
261 nature, with inevitable survival-reproduction trade-offs because organisms have to allocate  
262 limited resources among several functions that affect fitness. Neoplastic cells may also be  
263 subject to evolutionary trade-offs with respect to resource allocation and growth  
264 constraints<sup>12,20,21,35</sup>. The mixture of biotypes that form cancer cell populations can be  
265 characterized by survival-proliferation trade-offs, and directly quantified in controlled  
266 environments *in vitro*. Carrying out experimental evolution under *r*- and *K*-selection in cancer  
267 cell lines, we observe that cancer cell populations face a survival-reproduction trade-off. *r* cells  
268 are selectively favored to allocate the majority of their resources to reproductive activities at

269 the cost of their ability to propagate under crowded conditions, consistent with the central idea  
270 of the *r*- and *K*-selection theory<sup>4</sup>.

271 Our analysis of pathway enrichment and expression of differentially expressed genes  
272 reflects phenotypic differences in cell proliferation, cell death, and adhesion between *r* and *K*  
273 cells *in vitro* and *in vivo*. We observe higher growth and death rates in *r* cells, compared to *K*  
274 cells (Figure 1d and 1g, Figure 2b). Additionally, adhesion junctions and focal adhesion affect  
275 adherence capability of cells. Since trypsin is frequently applied to dissociate adhesive cells  
276 from their substratum<sup>82</sup>, we performed a trypsinization assay to quantify cell adhesive ability  
277 (Extended Data Figure 6). Extended Data Figure 14 shows that it takes significantly longer to  
278 digest attached *K* than *r* cells, confirming that *K* cells are more prone to adhesion.

279 Cells with higher fitness tend to maintain a relatively high transcriptome stability<sup>83</sup>. Changes  
280 in transcriptional profiles reveal that *r* cells are much more sensitive to density change than *K*  
281 cells, consistent with the observation that *r* cells have lower fitness at high density in  
282 competition assays (Figure 1b and 1c, Extended Data Figure 1a and 1b). Remarkably,  
283 differentially expressed genes that respond to density change in *r* cells are enriched in the cell  
284 cycle and DNA replication pathways (Extended Data Figure 7, 8), suggesting that *r* cells have  
285 different growth rates depending on culture conditions. This is consistent with direct  
286 measurements of growth rate at high and low density (Figure 1d).

287 Computer simulations which integrate of *r*- and *K*-selection theory predictions and  
288 parameters of inter-cell interaction based on Lotka–Volterra models illustrate temporal and  
289 spatial dynamics of population growth of heterogeneous cell populations following *r*- and *K*-  
290 strategies. The growth curves based on empirical data and mathematical models show that  
291 growth rates and fitness of *r*- and *K*-selected cells follow the logistic equations predicted by  
292 theory. As density increases, *K* cells dominate mixed cell populations. Our simulations, fitted  
293 to empirical data, establish a competitive relationship between phenotypically diverse cancer  
294 cells. In the short term, competition can decrease whole-population fitness. However it triggers  
295 niche differentiation leading cell types to occupy different niches, thus maximizing the use of  
296 available resources in the ecosystem<sup>60</sup>. Interaction between tumor cells further improves the  
297 total fitness of a tumor in the long term (Figure 5).

## 298 Materials and Methods

299



## 300 Cell line

301 The HeLa cell line was provided by the Cell Bank, Type Culture Collection Committee,  
302 Chinese Academy of Sciences. The test for mycoplasma contamination was negative. The  
303 HeLa-HPV18 single-nucleotide variants<sup>84</sup> were identified in the cell line. The HeLa cells were  
304 cultured in complete DMEM (Gibco) medium containing 10% FBS (Gibco) and antibiotics  
305 (100 µg/mL streptomycin and 100 units/mL penicillin, Sigma-Aldrich) at 37 °C in an  
306 atmosphere of 5% CO<sub>2</sub>.

## 307 Cell cryopreservation

308 Cells were first trypsinized using a 1X trypsin-EDTA solution at room temperature for three  
309 minutes and suspended in complete growth medium. Suspended cells were collected by  
310 centrifugation (1300 rpm, 5 min) and resuspended in 1X PBS. PBS suspended cells were  
311 collected by centrifugation (1300 rpm, 5 min) and resuspended in cryopreservation medium.  
312 The cryopreservation medium contains 10% DMSO and 90% FBS. Cryopreservation medium  
313 suspended cells were pipetted into a cryopreservation vial gently, and placed into a -80 °C  
314 freezer. Finally, vials were transferred into liquid nitrogen for long-term storage when  
315 temperature decreased to -40°C.

## 316 Subculture and Single-cell isolation

317 Cells were washed with 1X PBS three times after discarding cell culture medium, and  
318 trypsinized with 1X trypsin-EDTA solution at room temperature for three minutes. The  
319 detached cells were suspended, divided, and transferred into plates. Single cells were sorted  
320 into individual wells of 96-well plates by flow cytometry (BD) from a HeLa cell population.  
321 After six hours, a microscopic examination was performed to ensure only one cell in a well.

## 322 eGFP and dsRed transfection

323 Cells were transfected by Lentiviral vectors pLenti6.3-MCS-IRES-eGFP and pLenti6.3-  
324 MCS-IRES-dsRed (Invitrogen). Approximately  $5 \times 10^6$  HeLa cells were incubated in a 10cm  
325 dish with DMEM before transfection. After incubating for 24 h, the DMEM medium was  
326 replaced by 10 mL transfection-mix-medium that contains 8 µg/mL polybrene and  $10^6$  IU/mL  
327 lentivirus particles. The multiplicity of infection (MOI) value was 1. After transfecting for 24

328 hours, cells were washed with PBS three times. To select cells that stably express eGFP and  
329 DsRed, the transfected cells were cultured in DMEM medium with blasticidin (10  $\mu\text{g}/\text{mL}$ ) for  
330 at least four weeks.

### 331 Density-dependent selection

#### 332 Evolution experimental system

333 The initial cell population (IN-cells) derived from a single cell which was randomly selected  
334 from the HeLa cell line. When the population size of IN-cells reached  $10^7$ , it was randomly  
335 divided into two sub-populations of equal size. Each of sub-population was labeled with  
336 fluorescent proteins as described above. Density-dependent selection was performed on labeled  
337 cells.

#### 338 r-selection

339 Cells were cultured under low-density. To ensure low density, cells were seeded on the  
340 surface of a 10 cm dish with approximately  $128 \text{ cells}/\text{cm}^2$ . Every 120 hours when the  
341 population density reached to about  $4 \times 10^3 \text{ cells}/\text{cm}^2$ , a subset of cells was transferred to a  
342 new plate to keep a similar density as the original population ( $128 \text{ cells}/\text{cm}^2$ ). Six replicates  
343 (three with dsRed and three with eGFP) were maintained in this manner for almost 200 cell  
344 generations (200 days). Samples from each population were cryopreserved in liquid nitrogen  
345 every 40 days.

#### 346 K-selection

347 Cells were cultured under high-density. To ensure high density, cells were seeded on the  
348 surface of a 10 cm dish with approximately  $10^5 \text{ cells}/\text{cm}^2$ . Every 72 hours, when the  
349 population density reached to about  $2.2 \times 10^5 \text{ cells}/\text{cm}^2$ , a subset of cells was transferred to  
350 a new plate to keep a similar density as the original population ( $10^5 \text{ cells}/\text{cm}^2$ ). Six replicates  
351 (three with dsRed and three with eGFP) were maintained in this manner for almost 130 cell  
352 generations (200 days). Samples from each population were cryopreserved in liquid nitrogen  
353 every 40 generations.

## 354 Relative fitness assay

355 To measure the relative fitness of two cell populations cultured under a specific cell density  
356 (routine-, r-, or K-), the two cell populations were mixed and cultured together. The proportions  
357 of the two populations were monitored by flow cytometry (BD, Ex/Em (nm): 346/442) once a  
358 subculture was performed. Time between two subcultures depended on the culture protocol.  
359 The higher fitness population is the one dominating the mixed population over time.

## 360 Measurement of growth rate

361 Population growth rate was estimated using the equation (1):

$$362 \quad \frac{dN(t)}{dt} = rN(t), \quad (1)$$

363 where  $dN(t)$  is the total number of cells at time  $t$ , and  $r$  is a constant coefficient. To obtain  
364 a linear function, cell numbers were converted to base-2 logarithms. The least-squares method  
365 (LSM) was used to fit the linear regression with the slope ( $r$ ) of the regression line estimating  
366 the growth rate.

## 367 Soft agar colony formation assay

368 Approximately 1,000 cells were suspended in a top layer of 0.4% soft agar (SeaPlaque  
369 Agarose, BMA products). The cell suspensions were then overlaid onto a bottom layer of 1%  
370 soft agar containing complete DMEM supplemented with 10% FBS in six-well plates. After a  
371 week, colony number was counted. After three weeks, the images of colonies were collected  
372 to compare their diameters by microscopy.

## 373 *In vivo* tumor growth

374 Female BALB/c Nude mice were purchased from the Beijing Vital River Laboratory Animal  
375 Technology Co., Ltd. Mice were 5–10 weeks of age for all experiments and kept in germ-free  
376 environments in the Institute of Zoology, Chinese Academy of Science.

377 Five-week female BALB/c Nude mice were assigned randomly into cages upon arrival. IN-  
378 cells, r-cells, and K-cells were suspended in normal saline separately. 50  $\mu$ L cell suspension

379  $(2 \times 10^5 \text{ Cells}/\mu\text{L})$  was inoculated under the inguinal skin of the mice. For each type of cell  
380 inoculation, three mice were randomly selected and sacrificed every week from the third week  
381 after inoculation. Xenografts were collected for further analysis. Sample sizes were determined  
382 empirically (based on experience of other investigators who did similar assays). The  
383 experiments were not performed blind. All animal study protocols were reviewed and approved  
384 by the review boards of the Institute of Zoology Animal Care and Use Committee, Chinese  
385 Academy of Science (ethical approval reference number IOZ-20150061) and were conducted  
386 in accordance with the National Institutes of Health Guidelines for the Care and Use of  
387 Laboratory Animals. The maximal tumor diameter of 20 mm was permitted by Institute of  
388 Zoology Animal Care and Use Committee, Chinese Academy of Science. None of the  
389 experiments in this study exceeded this limit.

### 390 FACS analysis of G0/G1 phase and cell death/apoptosis

391 Cells were trypsinized and suspended in cold 1X PBS. Five  $\mu\text{L}$  propidium iodide (Sigma,  
392 P4170) was added to the suspension. Cells were incubated at 4 °C for 30 minutes. Stained cells  
393 were analyzed by flow cytometry (BD, Ex/Em (nm): 346/442). Data were collected from 10000  
394 stained cells.

395 The Annexin V, Alexa Fluor® 350 conjugate (Invitrogen, a23202) was used for apoptosis  
396 rate detection. Cells were trypsinized and diluted to  $\sim 1 \times 10^6$  cells/mL in the annexin binding  
397 buffer. Five  $\mu\text{L}$  annexin V conjugate was added to 100  $\mu\text{L}$  of the cell suspension. The cell  
398 suspension was incubated at room temperature for 15 minutes. After the incubation, 400  $\mu\text{L}$   
399 annexin-binding buffer was added. The samples were kept on ice after mixing gently. The  
400 stained cells were analyzed by flow cytometry (BD, Ex/Em (nm): 346/442). Data were  
401 collected from 10000 stained cells.

### 402 Necrotic area detection and calculation of the weight of viable cells in mouse 403 xenografts

404 The H&E (haematoxylin and eosin) staining of tumor sections was used to detect necrotic  
405 cells<sup>85</sup>. First, we prepared the central H&E staining section of a xenograft. The sections were  
406 then converted into digital images using Aperio Digital Pathology Slide Scanner (Leica). To  
407 detect necrotic areas in a xenograft, the images of sections were read via Matlab (MathWorks)

408 and converted to gray scale (rgb2gray function in Matlab). Image contrast was enhanced using  
409 histogram equalization (histeq function in Matlab). We then adjusted image intensity values  
410 twice with parameters low\_in=0.1 and high\_in=0.7 (imadjust function in Matlab) and applied  
411 the 2-D median filtering to the image with the filtering parameters m=5 and n=5 (medfilt2  
412 function in Matlab). Finally, we set grey scale value 90 as the threshold to distinguish the  
413 necrotic and non-necrotic areas of the image. The pixels in the tumor region with the grey scale  
414 value less than 90 were considered necrotic. The net weight of viable cells in a xenograft tumor  
415 was obtained by multiplying the total weight of a tumor by the proportion of the non-necrotic  
416 area.

### 417 RNA-seq and data analysis

418 Total RNA was isolated using the TRIzol reagent, as described by the manufacturer  
419 (15596018, Invitrogen). RNA-seq libraries were constructed and sequenced by Berry  
420 Genomics. RNA-seq NGS reads were aligned to the hg19 reference genome using the  
421 Mapslice aligner (version 2.1.8)<sup>86</sup> with default parameters. The gene-level expression levels  
422 were quantified by RSEM (Version 1.2.19)<sup>41</sup>, based on the TCGA mRNA-seq Pipeline  
423 ([https://webshare.bioinf.unc.edu/public/mRNAseq\\_TCGA/UNC\\_mRNAseq\\_summary.pdf](https://webshare.bioinf.unc.edu/public/mRNAseq_TCGA/UNC_mRNAseq_summary.pdf)).  
424 Differentially expressed genes between samples were detected using EBSeq (Version 1.1.5)<sup>87</sup>  
425 and were defined as the PPDE over 0.99. Gene set enrichment analysis of KEGG pathways  
426 was performed using the Functional Annotation Tool from DAVID with default parameters<sup>88,89</sup>.  
427 Expression perturbations in significant KEGG pathways were determined by GAGE<sup>46</sup> with  
428 default parameters.

### 429 Trypsinization assay

430 Cells were seeded on a six-well plate. After 12 hours, we discarded the culture medium and  
431 washed the cells with cold PBS three times. 500 $\mu$ L 0.05% Trypsin was added into the well at  
432 room temperature. The plate was swayed softly and slowly 20 times. All supernatant (about  
433 500 $\mu$ L) was transferred into a new tube. We pipetted the supernatant gently to make sure most  
434 cells were single individuals. 400 $\mu$ L of the supernatant was put back on the plate to trypsinize  
435 the remaining cells. Finally, we estimated cell numbers in the 100  $\mu$ L of the remaining  
436 supernatant ( $N_1$ ) and among the remaining cells ( $N_2$ ) using a hemocytometer. The following  
437 equation was used to calculate the trypsinised cell ratio within a time interval:

438 
$$\text{Ratio} = \frac{N_1}{N_1 + N_2} \times 100\%. \quad (2)$$

### 439 Immunofluorescence assay

440 Cells were seeded on coverslips. The coverslips were then placed on six-well plates. After a  
441 48-hour incubation, cells were fixed with 4% paraformaldehyde (PFA) in PBS for 20 minutes  
442 at room temperature, followed by blocking and permeabilization for 30 minutes in blocking  
443 buffer, comprising 2% bovine serum albumin (BSA) and 0.2% Triton X-100 in PBS. Cells  
444 were incubated with the Yap1 antibody (GTX35195, GeneTex) for one hour, then with the  
445 FITC-conjugated goat anti-rabbit IgG (H+L) polyclonal antibody (GTX 77059, GeneTex) for  
446 30 minutes. Both antibodies were diluted in PBS with 2% BSA. Cell nuclei were stained with  
447 Hoechst 33342 (H3570, Invitrogen). Images were acquired using a Leica TCS SP8 confocal  
448 laser microscopy system (Leica Microsystems).

### 449 Real-time quantitative PCR with reverse transcription

450 Total RNA was isolated using the TRIzol reagent, as described by the manufacturer  
451 (15596018, Invitrogen). 1 µg of RNA was used to generate cDNA with the High Capacity  
452 cDNA Reverse Transcription Kit (4368814, Applied Biosystems). Real-time quantitative PCR  
453 was performed to amplify cDNA by using Maxima STBR Green/ROX qPCR Master (K0223,  
454 Thermo Scientific) in a CFX96 Touch Real-Time PCR Detection System (Bio-Rad). The  
455 average threshold cycle (Ct) of quadruplicate reactions was determined and amplification was  
456 analyzed by the  $\Delta\Delta\text{Ct}$  method. Gene expression was normalized to that of GAPDH. Real-time  
457 quantitative PCR with reverse transcription data were representative of at least three  
458 independent experiments, with two technical replicates per experiment. Primer sequences used  
459 to amplify human DLG2 and GAPDH as follows:

460 human DLG2 forward: CAATGGGATGGCAGACTTTT;

461 human DLG2 reverse: ACAGCTCGGTGGAGAAACAT;

462 human GAPDH forward: ACAGCCTCAAGATCATCAGC;

463 human GAPDH reverse: ATGGACTGTGGTCATGAGTC.

## 464 siRNA knockdown

465 siRNAs (Lipofectamine 3000 transfection reagent) were used to knock down the expression  
466 of DLG2. To check the knockdown efficiency, total RNA was isolated and quantified by  
467 quantitative PCR (qPCR) three days after transfection. The target sequences used to knock  
468 down human DLG2 are as follows:

469 si-h-DLG2\_001: ACCUCAUUCUUUCCUAUGA;

470 si-h-DLG2\_002: GCUAGAACAAGAAUUUGGA;

471 si-h-DLG2\_003: GGAGAUGAAUAAGCGUCUA.

## 472 r/K competition assay *in vitro*

473 K cells with dsRed and r cells with eGFP were mixed together equally. Cell density of the  
474 mixture population was about  $2 \times 10^6$  cells/mL. 500  $\mu$ L of cell mixture was loaded on the central  
475 surface of an empty culture plate. After five minutes, the plate was put back to the incubator.  
476 When all cells attached (almost two hours), sufficient complete growth medium was added to  
477 the plate. Microscopic fluorescent field images of the plate were collected using imageXpress  
478 XLS (Molecular Devices) every three days. Image data were analyzed following the pipeline  
479 in the imageXpress XLS data analysis software (Molecular Devices).

## 480 Model fitting

481 Density dependent population dynamics can be predicted using a variety of mathematical  
482 models<sup>90,91</sup>. The logistic and Gompertz growth models are most frequently used<sup>92,93</sup>. To  
483 determine which mathematical model is suitable for us to predict cell population dynamics, we  
484 first obtained cell population dynamics data over eight days via the MTT cell proliferation  
485 assay, then fit population dynamics curves to three models: Logistic, Gompertiz, and  
486 Exponential (Extended data Figure 9). We created a nonlinear model for cell population growth  
487 based on the data from the MTT assay (fitnlm function in Matlab). The adjusted *r*-squared  
488 value of the logistic growth curve is 0.856, the Gompertz – 0.828, and exponential – 0.739.  
489 This suggests that the logistic growth model fits the data best.



## 490 Density-dependent population growth model

491 We chose the Lotka-Volterra (L-V) model to investigate population dynamics cell type  
492 mixtures<sup>64,94</sup>. We assume that the cell population 1 and cell population 2 are two sub-types of  
493 cells from the same population. These two types of cells compete for the same resources in a  
494 mixed population. The competitive Lotka–Volterra equations are

$$495 \begin{cases} \frac{dx_1}{dt} = R_{01}x_1 \left(1 - \frac{N_t + \alpha x_2}{C_1}\right) \\ \frac{dx_2}{dt} = R_{02}x_2 \left(1 - \frac{N_t + \beta x_1}{C_2}\right) \end{cases} \quad (3)$$

496 where  $x_i$  is the size of the  $i$ th population;  $R_{0i}$  is the inherent per-capita growth rate, and  $C_i$  is  
497 the carrying capacity.  $\alpha$  represents that the additional effect of cell population 2 on cell  
498 population 1 and  $\beta$  represents the additional effect cell population 1 on cell population 2.  $N_t$   
499 represents the total cell number at time  $t$ . Note, the meanings of  $\alpha$  and  $\beta$  are slightly different  
500 from the competitive coefficients in the general Lotka–Volterra equations.  $\alpha + 1$  and  $\beta + 1$   
501 are equivalent to competitive coefficients in the general Lotka–Volterra equations.

502 Per-capita growth rate ( $\mathbf{R}_0$ ) estimation: The inherent per-capita growth rate of every cell must  
503 be known at the beginning as the population growth model calculates the growth rate of every  
504 cell and its progenitors separately. It is an easy way to evaluate the inherent per-capita growth  
505 rate of every cell at the beginning via random sampling if the inherent per-capita growth rate  
506 distribution of a cell population is known. We isolated 141 single cells from the K-cell  
507 population and 100 single cells from the r-cell population and cultured them separately in wells  
508 of 96-well plates. Cells were counted every day for each clone over five days. The growth each  
509 cell over five days is considered exponential because cell density is very low.

510 Growth rate was estimated using the equation 4:

$$511 \frac{dN(t)}{dt} = rN(t), \quad (4)$$

512 where  $dN(t)$  is the total number of cells at time  $t$ , and  $r$  is a constant. To obtain a linear  
513 function, cell numbers were converted to base-2 logarithms. The least-squares method (LSM)  
514 was used to fit the linear regression in which the slope ( $r$ ) of the regression line estimates the  
515 growth rate.

516 We assume that mutations do not drastically affect the growth rate immediately. Therefore,  
517  $r$  is equivalent to the  $R_0$  of the initial single cell. We assume that the growth rate of any given  
518 type of cell comes from a specified normal distribution. We estimate distribution parameters  
519 from empirical growth rates of 141 K cells (for K cell simulations) and from 111 r cells.  
520 (Extended Data Table 5).

521 The distribution of the inherent per-capita growth rate of a cell population is  
522  $R_0 \sim \text{Norm}(\mu, \sigma^2)$  and lies within the interval  $R_0 \in (-\infty, +\infty)$ . The parameters of the inherent  
523 per-capita growth rate distributions are estimated using the function ‘*normfit*’ in MATLAB.  
524 The fitted distributions are  
525  $DR_{0r} \sim \text{Norm}(1.1832, 0.2441^2)$  and  $DR_{0K} \sim \text{Norm}(0.6823, 0.3764^2)$ .

526 Carrying capacity (C) estimation: Given the logistic cell population growth curve, carrying  
527 capacity can be estimated using the logistic growth function. We seeded r and K cells separately  
528 on six-well plates separately and assessed population size every 24 hours. The initial population  
529 size was  $1.5 \times 10^3$  cells (Extended Data Figure 10).

530 Since apoptotic cells could not be distinguished when the cell counting was performed each  
531 day, cell number may have been over-estimated. Severity of over estimation of r-cell number  
532 grows as cell density increases because these cells go into apoptosis at a high rate as conditions  
533 become crowded. It is necessary to correct the estimation of carrying capacity to eliminate the  
534 effect of apoptotic cells on cell count. The carrying capacity could be corrected by

$$535 \quad C_{cor} = C_{est}(1 - r_{apo}), \quad (5)$$

536 where the  $C_{cor}$  represents the corrected carrying capacity,  $C_{est}$  represents the estimated  
537 carrying capacity via curve fitting,  $r_{apo}$  represents the r- or K-cell apoptosis rate under high  
538 density (data were collected via FACS analysis of cell apoptosis).

539 The carrying capacity of r cells was estimated as  $C_r = 1.937 \times 10^4 \text{ cells/cm}^2$  and of K  
540 cells as  $C_K = 2.2216 \times 10^4 \text{ cells/cm}^2$ .

541  $\alpha$  and  $\beta$  estimation:  $\alpha$  and  $\beta$  directly influence population size. Cell growth rates can decrease  
542 rapidly  $\alpha$  and  $\beta$  are both large, leading to population sizes far beyond carrying capacity.  
543 However, empirical observations did not show significant reduction of population size when  
544 r- and K-cell were mixed together at high density. It suggests that either  $\alpha$  or  $\beta$  is very small.

545 The r- and K cells co-cultural assays suggest that K cells may have a higher competitive ability  
546 (Figure 4). This inference indicates that  $\beta$  should be near 0. Here we assume that  $\beta$  is between  
547 0 and 0.5 and  $\alpha$  between 0.5 and 3.

548 First, we use a grid-search scheme, all parameter pairs traversed with intervals 0.5, to  
549 estimate the  $\alpha$  and  $\beta$ . We predict the dynamics of an r and K-cell mixture population using the  
550 density-dependent growth model with set values of  $\alpha$  and  $\beta$ . Other parameters were fixed. We  
551 then calculated Pearson correlation coefficients between predictions and observations. These  
552 correlations are maximized when  $(\alpha, \beta) = (2.5, 0)$ . This fit is better than when  $(\alpha, \beta) = (2, 0)$   
553 or  $(\alpha, \beta) = (3, 0)$  (Extended Data Table 4). The correlation values increase and then decrease  
554 within the interval  $\alpha \in [2, 3]$  when  $\beta = 0$ . This suggests that the values of  $\alpha$  between 2 to 3 and  
555  $\beta = 0$  maximize the agreement between simulations and data.

556 We next repeated the grid-search scheme, traversing values of  $\alpha$  between 2 and 3 with  
557 intervals of 0.1 and setting  $\beta = 0$ . The final estimates are:  $\alpha = 2.2$  and  $\beta = 0$  (Extended Data  
558 Figure 5;11, Extended Data Table 4).

559 Cell population dynamics of the mixed population with among-cell competition are based  
560 on the values of  $C_r$ ,  $C_K$ ,  $C_r/\alpha$  and  $C_K/\beta$ . WE estimate  $C_r = 1.937 \times 10^4 \text{ cells/cm}^2$ ,  $C_K =$   
561  $2.2216 \times 10^4 \text{ cells/cm}^2$ ,  $\alpha = 2.2$ , and  $\beta = 0$ . Thus,  $C_r/\alpha = 9.685 \times 10^3$  and  $C_K/\beta$  is infinite.  
562 Here  $C_K > C_r/\alpha$  and  $C_r < C_K/\beta$  indicate that r cells would eventually go extinct when  
563 competing with K cells<sup>95</sup>.

## 564 Spatial growth model

565 Tumor cells living in a limited space cannot move freely. Among-cell interactions are also  
566 confined to a limited space, precluding interaction when between-cell distance is large. Given  
567 these considerations, we assume that there is a cell-centric limited space for every cell where  
568 the density-dependent effects which impact the central cell are confined. We call this density-  
569 dependent space (DDS; for more details see Stochastic simulation of cell growth with spatial  
570 structure).

571 When a population grows logistically, its growth is exponential early on, provided it  
572 carrying capacity is much greater than its size. However, if carrying capacity is small, early-

573 stage population size increase results in a drastic decrease in growth rate. Carrying capacity is  
 574 related to the size of the habitat. In a DDS, the maximum carrying capacity is 36 (Extended  
 575 Data Figure 13, methods: Carrying capacity estimation of spatial growth model). Here we use  
 576  $C_s$  to represent the carrying capacity in a DDS. Because the  $C_s$  value is very small (compare to  
 577  $C$  in equations (3)), the equations (1) are not applicable to predict the dynamics of r- and K-  
 578 cell mixed population using the spatial growth model. In addition, only when cell density  
 579 exceeds a certain threshold, do the cells become subject to density-dependent growth. A  
 580 reasonable value of the threshold is  $\frac{C_s}{2}$  as the population growth rate achieves its maximum  
 581 when the population size reaches  $\frac{C_s}{2}$ .

582 For two cell sub-populations, we let

$$583 \quad X_1 = N_t + \alpha x_2, \quad (6)$$

$$584 \quad X_2 = N_t + \beta x_1, \quad (7)$$

585 where  $X_1$  represents the practical population size which determines the density-dependent  
 586 growth rate of population 1;  $X_2$  is defined similarly for population 2.

587 When  $X_1 \leq \frac{C_{s1}}{2}$ , the growth rate of population 1 is equal to its inherent growth rate, and  
 588 similarly for population 2 when  $X_2 \leq \frac{C_{s2}}{2}$ . For population 1, we have

$$589 \quad 1 - \frac{\lambda \left( C_{s1} - \frac{C_{s1}}{2} \right)}{C_{s1}} = 0, \quad (8)$$

590 Where the  $\lambda$  is a constant. By solving the equations 7, we get  $\lambda = 2$ . The final equations are

$$591 \quad \begin{cases} \frac{dx_1}{dt} = R_{01}x_1 & X_1 \leq \frac{C_{s1}}{2} \\ \frac{dx_1}{dt} = R_{01}x_1 \left( 1 - \frac{2(N_t + \alpha x_2) - C_{s1}}{C_{s1}} \right) & X_1 > \frac{C_{s1}}{2} \\ \frac{dx_2}{dt} = R_{02}x_2 & X_2 \leq \frac{C_{s2}}{2} \\ \frac{dx_2}{dt} = R_{02}x_2 \left( 1 - \frac{2(N_t + \beta x_1) - C_{s2}}{C_{s2}} \right) & X_2 > \frac{C_{s2}}{2} \end{cases}. \quad (9)$$

592 Carrying capacity estimation of the spatial growth model: In the spatial model, we assume that  
 593 the density-dependent space (DDS) is a square area which contains 36 grid coordinates (6X6

594 grids, Extended Data Figure 10). Because the carrying capacity of  $K$ -cells is 1.147 times that  
595 of  $r$ -cells ( $\frac{C_K}{C_r} \approx 1.147$ ; more details see the carrying capacity estimation), in a DDS the  
596 carrying capacity of  $K$ -cells is  $C_{SK} = 36$  (the maximum number for the region), and of  $r$ -cells  
597 is  $C_{Sr} = 31$ .

## 598 Stochastic simulation of population growth of $r$ and $K$ cells in co-cultures

599 Cells in culture are subject to artifacts, such as subculture. A subculture is performed when cell  
600 density exceeds a threshold (roughly 70% to 90% confluent) and is used to maintain cell density.  
601 The subculturing procedure includes recommended split-ratios and cultural medium  
602 replenishment schedules. A realistic *in silico* cell culture model should take into account such  
603 artifacts. The details of the stochastic simulation procedures are as follows:

604 **Initiation:** We assign the initial inherent per-capita growth rate to every cell on initialization.  
605 Here we assumed that growth rates of cells in a population come from a normal distribution.  
606 Every cell is assigned an initial growth rate sampled from its growth rate distribution (see the  
607 per-capita growth rate estimation for details). To avoid outliers, random sampling was based  
608 on a truncated distribution (within the interval  $R_0 \in (Q1, Q3)$ ) of the inherent per-capita  
609 growth rate.  $Q1$  is the lower quartile and  $Q3$  the upper quartile of the observed growth rate  
610 distribution respectively (Extended Data Table 5). The initial population size was chosen  
611 according to culturing methods being simulated and followed experimental conditions.

612 **Population growth and sub-culture:** Cell division is based on growth rate. Each cell in a  
613 population, enters the division stage only if the cell growth rate is over 0. In the stochastic  
614 simulation, the time of a cell cycle ( $CT$ ) was defined as

$$615 \quad CT = 24/R, \quad (10)$$

616 where the  $R$  represents the growth rate of a cell calculated from the density-dependent  
617 population growth model.  $CT$  is measured in hours. The biological meaning of  $R$  is the number  
618 of cell divisions within 24 hours. Considering the characteristics of the cell cycle, the time of  
619 interphase of mitosis occupies nearly 90% of the entire cycle<sup>96</sup>. Thus, cell division time ( $DT$ )  
620 is:

$$621 \quad DT = 0.9 \cdot CT + \text{geornd}(1/(0.1 \cdot CT)), \quad (11)$$

622 where *geornd* means a random number sampled from a geometric distribution. If the time  
623 since the last cell division is greater than DT, the cell divides into two cells. When the culture  
624 time exceeds 72 hours (*K*-selection conditions), subculture was performed. Population size was  
625 reduced to the initial population size during subculture by random selection. After subculture,  
626 cells continue to grow *in silico*.

627 Six mixed populations with different r- and K-cell initial proportions (r:K=99:1, r:K =9:1,  
628 r:K =7:3, r:K =1:1, r:K =3:7, r:K =1:9) were simulated. 100 simulations were performed for  
629 each population type (Extended Data Figure 12).

### 630 Stochastic simulation of population growth with spatial structure

631 Tumor cells live in a spatially heterogeneous environment<sup>97,98</sup>. The distribution of cell density  
632 within a tumor should therefore be non-uniform. Spatial structure plays an important role in  
633 population dynamics<sup>31,61,99–105</sup>. In a given cell growth space, if the real-time location of cells  
634 can be determined, the spatial structure of the whole population can be described. For this  
635 reason, we constructed a two-dimensional lattice-based growth space where physiological  
636 activities such as cell growth and migration are carried out. The location of cells is determined  
637 by grid coordinates. (Extended Data Figure 13)

638 To simulate the population dynamics of cells which grow on a two-dimensional surface as  
639 realistically as possible, we considered the following factors that can influence spatial structure:  
640 cellular morphological characteristics, cell migration, cell proliferation, and cell death.

641 **In-silico cellular morphology:** The growth of cells on a two-dimensional surface may result  
642 in regional differences in cell density due to uneven cell distribution or different growth rates  
643 (Extended Data Figure 14a). In other words, the density-dependent spatial heterogeneity exists  
644 in the cell growth environment. In addition, space occupied by cells varies under different  
645 densities. In a low-density environment, cells occupy a larger area, increasing cell surface to  
646 maximize contact with the culture medium. Because of crowding, cells are arranged closely.  
647 The attachment area of a cell decreases in a high-density environment (Extended Data Figure  
648 14b). Therefore, we assume cells have two in-silico morphological types: large cell,  
649 corresponding to cells growing in a low density environment, occupying four coordinate grid;  
650 small cell, corresponding to cells growing in high density environment, occupying one  
651 coordinate grid (Extended Data Figure 13). The *in silico* cellular morphology can be

652 transformed between large and small cells. When there is an empty coordinate around a small  
653 cell that can accommodate a large cell, the small cell preferentially transforms into a large cell.  
654 A large cell will switch its morphology to two small cells via cell division when and only when  
655 there is no space around it that can accommodate two large cells, and there is space to  
656 accommodate two small cells.

657 **Cell migration:** Cells migrate with a certain rate in their growth space. When a migration event  
658 occurs, the coordinates of cells in the growth space change once, and the migration must occur  
659 to adjacent coordinates (Extended Data Figure 13). The migration direction of each step is  
660 assumed random. Cells differ in their migration speed. r cells migrate more readily than K cells,  
661 as measured by a trans-well migration assay. The mean migration speed of r-cells is close to  
662 five times higher than K cells (Extended Data Figure 15). Here we assume that the migration  
663 speed follows a beta distribution. The parameter “a” of the beta distribution is 5. The expected  
664 migration speed of r cells is 0.5 and of K cells is 0.1.

665 **Cell proliferation:** A division event can only be completed in two adjacent coordinates. Cells  
666 retain their original cellular morphology during division. If there is no space to proliferate,  
667 small cells die.

668 **Cell death:** When a cell dies, its original coordinate is marked as empty and can be occupied  
669 by another cell via cell division or migration. Death occurs if a cell that must divide but has no  
670 space to do so, or if a cell is affected by high density (calculated by Equations (9)).

671 **Density-dependent space:** Density-dependent space (DDS) is a square region containing 36  
672 grids (6X6 grids). A cell can be in the center (large cells) or on the grid coordinate (3,3) whose  
673 origin is the top-left of the DDS grid (small cells). We assume that only the cells located in the  
674 DDS contribute the density effects to the central cell (Extended Data Figure 13).

675 **Simulation process:** The simulation program of cell growth with spatial structure is divided  
676 into two processes: initiation and population growth. In the initiation process, cells were loaded  
677 in the center of the growth space. All cells were clustered together to form a circle community.  
678 This constructs a density-dependent spatially heterogeneous environment for cell growth. The  
679 outside space low-density, while inside the cell community is a relatively high-density  
680 environment. The inherent per-capita growth rate (Normal distribution; the same as the  
681 initiation process in the stochastic simulation of cell growth with subculture) and migration  
682 speed (Beta distribution) of each cell were initiated with random sampling. Finally, the



683 program calculates a constant variable  $\delta t$ , which represents the minimal time interval that can  
684 contain a migration event. In the population growth process, the migration and proliferation of  
685 cells depend on the migration rate and the density growth rate (calculated by Equations (9)).  
686 The migration rate and the inherent per-capita growth rate were maintained between mother  
687 and daughter cells. The program iterates all cells and calculates their density growth rates.  $\delta t$   
688 is the time interval between iterations.

#### 689 MTT assay

690 Cells were suspended and seeded at the concentration of 500 cells/well in 96-well plate. A  
691 volume of 20  $\mu$ l dissolved MTT was pipetted into each well. After incubating for 4 h at 37 °C  
692 in a humidified CO<sub>2</sub> incubator, the medium was removed and 200  $\mu$ l sterile DMSO was added  
693 to each well. Absorbance values were then read at 570 nm with a microplate spectrophotometer.  
694 The proliferation of living cells was monitored based on absorbance values.

#### 695 Migration assay

696 Migration assay was performed using 6.5mm Transwell inserts (3422, Corning) containing  
697 polycarbonate membrane filters (8- $\mu$ m pore size) for 24-well plates. Briefly, cells were  
698 digested with 0.05% trypsin, and suspended in a FBS-free DMEM culture medium. Cells were  
699 then plated into the upper chamber (3 $\times$ 10<sup>3</sup> cells/well). At the same time, 650 $\mu$ L of DMEM  
700 with 10% FBS was added to the lower chamber of the well and the plates were incubated for  
701 five hours at 37 °C with 5% CO<sub>2</sub>. After incubation, cells on the upper surface of the membranes  
702 were removed gently with cotton swabs. Cells that had entered the lower surface of the filter  
703 membrane were stained with 0.1% Hoechst 33342 (H3570, Invitrogen) for 30 minutes at room  
704 temperature, and washed three times with PBS. Four randomly selected fields in each well  
705 were image captured with the ImageXpress Micro HCS (Molecular Devices), and migrated  
706 cells were counted. n = 3 independent experiments.

#### 707 Statistical analyses

708 Statistical analyses were performed using R. Student's *t*-test and Wilcoxon test were used  
709 for calculating significance of between-group differences. Statistical significance is indicated  
710 by P < 0.05. All data were expressed as mean  $\pm$  s.d. of at least three independent experiments.

## 711 References

- 712 1. Parry, G. D. The meanings of r-and K-selection. *Oecologia* **48**, 260–264 (1981).
- 713 2. Pianka, E. R. On r- and K-Selection. *The American Naturalist* **104**, 592–597 (1970).
- 714 3. Don, C. S. G., Sonchifolia, E. & De, L. On r- And K- Selection Theory : Life History Strategy of Emilia. **3**,  
715 35–39 (2013).
- 716 4. Reznick, D. N., Bryant, M. . M. J. & Bashey, F. r - AND K -SELECTION REVISITED : THE ROLE OF  
717 POPULATION REGULATION IN LIFE-HISTORY EVOLUTION Special Feature. *Ecology* **83**, 1509–  
718 1520 (2002).
- 719 5. Long, T. & Long, G. The effects of r and K selection on components of variance for two quantitative traits.  
720 *Genetics* **76**, 567–573 (1974).
- 721 6. Greaves, M. & Maley, C. C. Clonal evolution in cancer. *Nature* **481**, 306–313 (2012).
- 722 7. Korolev, K. S., Xavier, J. B. & Gore, J. Turning ecology and evolution against cancer. *Nat. Rev. Cancer* **14**,  
723 371–380 (2014).
- 724 8. Tabassum, D. P. & Polyak, K. Tumorigenesis: It takes a village. *Nat. Rev. Cancer* **15**, 473–483 (2015).
- 725 9. Shibata, D. Heterogeneity and tumor history. *Science (80-. )*. **336**, 304–305 (2012).
- 726 10. Wodarz, D. & Komarova, N. L. Dynamics of Cancer. (2014). doi:10.1142/8973
- 727 11. Jacqueline, C. *et al.* Cancer : A disease at the crossroads of trade- - offs. 215–225 (2017).  
728 doi:10.1111/eva.12444
- 729 12. Aktipis, C. A., Boddy, A. M., Gatenby, R. A., Brown, J. S. & Maley, C. C. Life history trade-offs in cancer  
730 evolution. *Nat. Rev. Cancer* **13**, 883–892 (2013).
- 731 13. Silvertown, J. *Demons in Eden: The Paradox of Plant Diversity*. (University of Chicago Press, 2008).
- 732 14. Law, R. Optimal Life Histories Under Age-Specific Predation. *Am. Nat.* **114**, 399–417 (1979).
- 733 15. Stearns, S. Trade-offs in life-history evolution. *Funct. Ecol.* **3**, 259–268 (1989).
- 734 16. Cain, M. L., Bowman, W. D. & Hacker, S. D. *Ecology*. (Sinauer, 2014).
- 735 17. Stearns, S. C. THE EVOLUTION OF LIFE HISTORY TRAITS : A Critique of the Theory and a Review of  
736 the Data. *Critique* (1977).
- 737 18. Williams, G. C. Pleiotropy, Natural Selection, and the Evolution of Senescence. *Evolution* **11**, 398 (1957).

- 738 19. Hanahan, D. & Weinberg, R. A. Hallmarks of cancer: The next generation. *Cell* **144**, 646–674 (2011).
- 739 20. Hayakawa, S. No cancer in cancers: Evolutionary trade-off between successful viviparity and tumor escape  
740 from the adaptive immune system. *Med. Hypotheses* **66**, 888–897 (2006).
- 741 21. Jacqueline, C. *et al.* Cancer: A disease at the crossroads of trade-offs. *Evol. Appl.* **10**, 215–225 (2017).
- 742 22. Ling, S. *et al.* Correction for Ling et al., Extremely high genetic diversity in a single tumor points to  
743 prevalence of non-Darwinian cell evolution. *Proc. Natl. Acad. Sci.* **113**, E663–E663 (2016).
- 744 23. Wu, C.-I., Wang, H.-Y., Ling, S. & Lu, X. The Ecology and Evolution of Cancer: The Ultra-  
745 Microevolutionary Process. *Annu. Rev. Genet.* **50**, 347–369 (2016).
- 746 24. Li, C. *et al.* A direct test of selection in cell populations using the diversity in gene expression within  
747 tumors. *Mol. Biol. Evol.* **34**, 1730–1742 (2017).
- 748 25. Merlo, L. M. F., Pepper, J. W., Reid, B. J. & Maley, C. C. Cancer as an evolutionary and ecological process.  
749 *Nat. Rev. Cancer* **6**, 924–935 (2006).
- 750 26. Frank, S. a. *Dynamics of Cancer. Incidence, Inheritance, and Evolution. Dynamics of Cancer. Incidence,*  
751 *Inheritance, and Evolution* (2007). doi:10.1053/j.gastro.2010.01.058
- 752 27. Nowell, P. & C., P. The clonal evolution of tumor cell populations. *Science (80-. ).* **194**, 23–28 (1976).
- 753 28. Nowak, M. A. *EcologyEvolutionary dynamics: exploring the equations of life.* (Harvard University Press,  
754 2006, 2006).
- 755 29. Crespi, B. & Summers, K. Evolutionary biology of cancer. *Trends Ecol. Evol.* **20**, 545–552 (2005).
- 756 30. Basanta, D. & Anderson, A. R. A. Exploiting ecological principles to better understand cancer progression  
757 and treatment. *Interface Focus* **3**, (2013).
- 758 31. Gatenby, R. A., Silva, A. S., Gillies, R. J. & Frieden, B. R. Adaptive therapy. *Cancer Res.* **69**, 4894–4903  
759 (2009).
- 760 32. Hendry, A. P. Key questions in the genetics and genomics of eco-evolutionary dynamics. *Heredity (Edinb).*  
761 **111**, 456–466 (2013).
- 762 33. Maley, C. C. *et al.* Classifying the evolutionary and ecological features of neoplasms. *Nat. Rev. Cancer* **17**,  
763 605–619 (2017).
- 764 34. Pepper, J. W., Findlay, C. S., Kassen, R., Spencer, S. L. & Maley, C. C. Cancer research meets evolutionary  
765 biology. *Evol. Appl.* **2**, 62–70 (2009).
- 766 35. Gallaher, J. A., Brown, J. & Anderson, A. R. A. The dynamic tumor ecosystem : how cell turnover and

- 767 trade-offs affect cancer evolution. (2018).
- 768 36. Mueller, L. D. Density-Dependent Population Growth and Natural Selection in Food-Limited Environments:  
769 The Drosophila Model. *Am. Nat.* **132**, 786–809 (1988).
- 770 37. MacArthur, R. H. & Wilson, E. O. The Theory of Island Biogeography. *Science* **159**, 71–72 (1968).
- 771 38. Lansing, E., Velicer, G. J. & Lenski, R. E. Evolutionary Trade-Offs under Conditions of Resource  
772 Abundance and Scarcity : Experiments with Bacteria. *Ecology* **80**, 1168–1179 (1999).
- 773 39. Velicer, G. J. & Lenski, R. E. Evolutionary Trade-Offs under Conditions of Resource Abundance and  
774 Scarcity : Experiments with Bacteria Published by : Ecological Society of America EVOLUTIONARY  
775 TRADE-OFFS UNDER CONDITIONS OF RESOURCE ABUNDANCE AND SCARCITY :  
776 EXPERIMENTS WITH BACTERIA. *America (NY)*. **80**, 1168–1179 (2010).
- 777 40. Southwood, T. R. E., May, R. M., Hassell, M. P. & Conway, G. R. Ecological Strategies and Population  
778 Parameters. *Am. Nat.* **108**, 791–804 (1974).
- 779 41. Li, B. & Dewey, C. N. RSEM: Accurate transcript quantification from RNA-Seq data with or without a  
780 reference genome. *BMC Bioinformatics* **12**, (2011).
- 781 42. Li, B., Ruotti, V., Stewart, R. M., Thomson, J. A. & Dewey, C. N. RNA-Seq gene expression estimation  
782 with read mapping uncertainty. *Bioinformatics* **26**, 493–500 (2009).
- 783 43. He, C. & Klionsky, D. J. Regulation Mechanisms and Signaling Pathways of Autophagy. *Annu. Rev. Genet.*  
784 **43**, 67–93 (2009).
- 785 44. Pearson, G. *et al.* Mitogen-Activated Protein ( MAP ) Kinase Pathways : **22**, 153–183 (2001).
- 786 45. Brown, E. J. & Schreiber, S. L. A signaling pathway to translational control. *Cell* **86**, 517–20 (1996).
- 787 46. Luo, W., Friedman, M. S., Shedden, K., Hankenson, K. D. & Woolf, P. J. GAGE: Generally applicable gene  
788 set enrichment for pathway analysis. *BMC Bioinformatics* **10**, 1–17 (2009).
- 789 47. Kim, S., Chin, K., Gray, J. W. & Bishop, J. M. A screen for genes that suppress loss of contact inhibition:  
790 identification of ING4 as a candidate tumor suppressor gene in human cancer. *Proc. Natl. Acad. Sci. U. S. A.*  
791 **101**, 16251–6 (2004).
- 792 48. Takai, Y., Miyoshi, J., Ikeda, W. & Ogita, H. Nectins and nectin-like molecules: Roles in contact inhibition  
793 of cell movement and proliferation. *Nat. Rev. Mol. Cell Biol.* **9**, 603–615 (2008).
- 794 49. Gumbiner, B. M. & Kim, N.-G. The Hippo-YAP signaling pathway and contact inhibition of growth. *J. Cell*  
795 *Sci.* **127**, 709–717 (2014).
- 796 50. Halder, G. & Johnson, R. L. Hippo signaling: growth control and beyond. *Development* **138**, 9–22 (2011).

- 797 51. Zhao Li, L., Lei, Q. and Guan, K. L., B. The Hippo-YAP pathway in organ size control and tumorigenesis:  
798 an updated version. *Genes Dev.* **24**, 862–874 (2010).
- 799 52. Yu, F. X. *et al.* Regulation of the Hippo-YAP pathway by G-protein-coupled receptor signaling. *Cell* **150**,  
800 780–791 (2012).
- 801 53. Yu, F. X. & Guan, K. L. The Hippo pathway: Regulators and regulations. *Genes Dev.* **27**, 355–371 (2013).
- 802 54. Bao, Y., Hata, Y., Ikeda, M. & Withanage, K. Mammalian Hippo pathway: From development to cancer and  
803 beyond. *J. Biochem.* **149**, 361–379 (2011).
- 804 55. Dunn, B. & Ma, X. The dark side of hippo signaling: A cancer promoter role. *Fly* **11**, 271–276 (2017).
- 805 56. Chen, C. & Halder, G. The Hippo Signaling Pathway and Cancer. 307–325 (2013). doi:10.1007/978-1-  
806 4614-6220-0
- 807 57. Chen, C.-L., Schroeder, M. C., Kango-Singh, M., Tao, C. & Halder, G. Tumor suppression by cell  
808 competition through regulation of the Hippo pathway. *Proc. Natl. Acad. Sci.* **109**, 484–489 (2012).
- 809 58. B., Z. *et al.* Angiomotin is a novel Hippo pathway component that inhibits YAP oncoprotein. *Genes Dev.*  
810 **25**, 51–63 (2011).
- 811 59. Humbert, P. O. *et al.* Control of tumourigenesis by the Scribble/Dlg/Lgl polarity module. *Oncogene* **27**,  
812 6888–6907 (2008).
- 813 60. Hardin, G. The Competitive Exclusion Principle. *Science* **131**, 1292–1297 (1960).
- 814 61. Orlando, P. A., Gatenby, R. A. & Brown, J. S. Tumor Evolution in Space: The Effects of Competition  
815 Colonization Tradeoffs on Tumor Invasion Dynamics. *Front. Oncol.* **3**, 1–12 (2013).
- 816 62. Steiner, C. F. Impacts of density-independent mortality and productivity on the strength and outcome of  
817 competition. *Ecology* **86**, 727–739 (2005).
- 818 63. Lotka, A. J. Contribution to the Mathematical Theory of Capture: I. Conditions for Capture. *Proc. Natl.*  
819 *Acad. Sci. U. S. A.* **18**, 172–8 (1932).
- 820 64. Lotka, J. Natural Selection as a Physical Principle. *Proc. Natl. Acad. Sci. U. S. A.* **8**, 151–154 (1922).
- 821 65. Sprott, J. C., Vano, J. A., Wildenberg, J. C., Anderson, M. B. & Noel, J. K. Coexistence and chaos in  
822 complex ecologies. *Phys. Lett. Sect. A Gen. At. Solid State Phys.* **335**, 207–212 (2005).
- 823 66. Holzer, M. & Scheel, A. A slow pushed front in a Lotka-Volterra competition model. *Nonlinearity* **25**,  
824 2151–2179 (2012).
- 825 67. Muhammadhaji, A., Teng, Z. & Rehim, M. On a Two Species Stochastic Lotka-Volterra Competition

- 826 System. *J. Dyn. Control Syst.* **21**, 495–511 (2015).
- 827 68. Kingsland, S. Alfred J. Lotka and the origins of theoretical population ecology. *Proc. Natl. Acad. Sci.* **112**,  
828 9493–9495 (2015).
- 829 69. He, X. & Ni, W. M. Global dynamics of the Lotka–Volterra competition–diffusion system with equal  
830 amount of total resources, II. *Calc. Var. Partial Differ. Equ.* **55**, 1–20 (2016).
- 831 70. Url, S., Society, B. E., Archive, T. J. & Archive, T. J. Trade-Offs in Life-History Evolution S. C. Stearns. **3**,  
832 259–268 (2008).
- 833 71. Creighton, J. C. C., Heflin, N. D. D. & Belk, M. C. C. Cost of Reproduction, Resource Quality, and  
834 Terminal Investment in a Burying Beetle. *Am. Nat.* **174**, 673–684 (2009).
- 835 72. Prowse, N. & Partridge, L. The effects of reproduction on longevity and fertility in male *Drosophila*  
836 *melanogaster*. *J. Insect Physiol.* **43**, 501–512 (1997).
- 837 73. Zakrzewska, A. *et al.* Genome-wide analysis of yeast stress survival and tolerance acquisition to analyze the  
838 central trade-off between growth rate and cellular robustness. *Mol. Biol. Cell* **22**, 4435–4446 (2011).
- 839 74. Soskine, M. & Tawfik, D. S. Mutational effects and the evolution of new protein functions. *Nat. Rev. Genet.*  
840 **11**, 572–582 (2010).
- 841 75. Floor, S. L., Dumont, J. E., Maenhaut, C. & Raspe, E. Hallmarks of cancer: Of all cancer cells, all the time?  
842 *Trends Mol. Med.* **18**, 509–515 (2012).
- 843 76. Nourmohammad, A. *et al.* Gene expression variability across cells and species shapes innate immunity.  
844 *Nature* **563**, 197–202 (2018).
- 845 77. Spencer, S. L., Gaudet, S., Albeck, J. G., Burke, J. M. & Sorger, P. K. Non-genetic origins of cell-to-cell  
846 variability in TRAIL-induced apoptosis. *Nature* **459**, 428–432 (2009).
- 847 78. Colman-Lerner, A. *et al.* Regulated cell-to-cell variation in a cell-fate decision system. *Nature* **437**, 699–706  
848 (2005).
- 849 79. Warner, A. E., Guthrie, S. C. & Gilula, N. B. Antibodies to gap-junctional protein selectively disrupt  
850 junctional communication in the early amphibian embryo. *Nature* **311**, 127–131 (1984).
- 851 80. Marusyk, A., Almendro, V. & Polyak, K. Intra-tumour heterogeneity: A looking glass for cancer? *Nat. Rev.*  
852 *Cancer* **12**, 323–334 (2012).
- 853 81. Marusyk, A. & Polyak, K. Tumor heterogeneity: Causes and consequences. *Biochim. Biophys. Acta - Rev.*  
854 *Cancer* **1805**, 105–117 (2010).
- 855 82. Huang, H. *et al.* Trypsin-induced proteome alteration during cell subculture in mammalian cells. 1–10

- 856 (2010).
- 857 83. López-Maury, L., Marguerat, S. & Bähler, J. Tuning gene expression to changing environments: From rapid  
858 responses to evolutionary adaptation. *Nat. Rev. Genet.* **9**, 583–593 (2008).
- 859 84. Meissner, J. D. Nucleotide sequences and further characterization of human papillomavirus DNA present in  
860 the CaSki, SiHa and HeLa cervical carcinoma cell lines. *J. Gen. Virol.* **80**, 1725–1733 (1999).
- 861 85. Degenhardt, K. *et al.* Autophagy promotes tumor cell survival and restricts necrosis, inflammation, and  
862 tumorigenesis. *Cancer Cell* **10**, 51–64 (2006).
- 863 86. Wang, K. *et al.* MapSplice: Accurate mapping of RNA-seq reads for splice junction discovery. *Nucleic*  
864 *Acids Res.* **38**, 1–14 (2010).
- 865 87. Leng, N. *et al.* EBSeg: An empirical Bayes hierarchical model for inference in RNA-seq experiments.  
866 *Bioinformatics* **29**, 1035–1043 (2013).
- 867 88. Huang DW, B. T. S., Lempicki, R. A. & others. Systematic and integrative analysis of large gene lists using  
868 DAVID bioinformatics resources. *Nat. Protoc.* **4**, 44–57 (2008).
- 869 89. Huang, D. W., Sherman, B. T. & Lempicki, R. A. Bioinformatics enrichment tools: Paths toward the  
870 comprehensive functional analysis of large gene lists. *Nucleic Acids Res.* **37**, 1–13 (2009).
- 871 90. Carroll, G. R. & Hannan, M. T. Density Dependence in the Evolution of Populations of Newspaper  
872 Organizations Author(s): *Am. Sociol. Rev.* **54**, 524–541 (1989).
- 873 91. Hassell, B. Y. M. P. Density-Dependence in Single-Species Populations. *J. Anim. Ecol.* **44**, 283–295 (1975).
- 874 92. Gompertz, B., Transactions, P. & Society, R. On the Nature of the Function Expressive of the Law of  
875 Human Mortality, and on a New Mode of Determining the Value of Life Contingencies. *Philos. Trans. of the*  
876 *R. Soc. London* **115**, 513–583 (1825).
- 877 93. Verhulst, P. F. Recherches mathématiques sur la loi d'accroissement de la population. *Nouv. mémoires*  
878 *l'Académie R. des Sci. B.-lett. Bruxelles* 14–54 (1845).
- 879 94. Volterra, V. Fluctuations in the abundance of a species considered mathematically. *Nature* **118**, 558–560  
880 (1926).
- 881 95. Bomze, I. M. Lotka-Volterra equation and replicator dynamics: A two-dimensional classification. *Biol.*  
882 *Cybern.* **48**, 201–211 (1983).
- 883 96. LODISH, H. *et al.* *Molecular Cell Biology*. (Macmillan Learning, 2016).
- 884 97. Boutros, P. C. *et al.* Spatial genomic heterogeneity within localized, multifocal prostate cancer. *Nat. Genet.*  
885 **47**, 1–14 (2015).



- 886 98. Hao, J.-J. *et al.* Spatial intratumoral heterogeneity and temporal clonal evolution in esophageal squamous  
887 cell carcinoma. *Nat Genet* **48**, 1500–1507 (2016).
- 888 99. Chen, J., Sprouffske, K., Huang, Q. & Maley, C. C. Solving the puzzle of metastasis: The evolution of cell  
889 migration in neoplasms. *PLoS One* **6**, (2011).
- 890 100. Tang, L. *et al.* Computational modeling of 3D tumor growth and angiogenesis for chemotherapy  
891 evaluation. *PLoS One* **9**, 1–12 (2014).
- 892 101. Waclaw, B. *et al.* Spatial model predicts dispersal and cell turnover cause reduced intra-tumor  
893 heterogeneity. *Nature* **525**, 261–267 (2015).
- 894 102. Düchting, W. & Vogelsaenger, T. Three-dimensional pattern generation applied to spheroidal tumor  
895 growth in a nutrient medium. *Int. J. Biomed. Comput.* **12**, 377–392 (1981).
- 896 103. Hao, J.-J. *et al.* Spatial intratumoral heterogeneity and temporal clonal evolution in esophageal squamous  
897 cell carcinoma. *Nat. Genet.* **48**, 1500–1507 (2016).
- 898 104. Duchtung, W. Spatial Structure of Tumor Growth : A Simulation Study. 292–296 (1980).
- 899 105. Robertson-Tessi, M., Gillies, R. J., Gatenby, R. A. & Anderson, A. R. A. A. Impact of metabolic  
900 heterogeneity on tumor growth, invasion, and treatment outcomes. *Cancer Res.* **75**, 1567–1579 (2015).
- 901

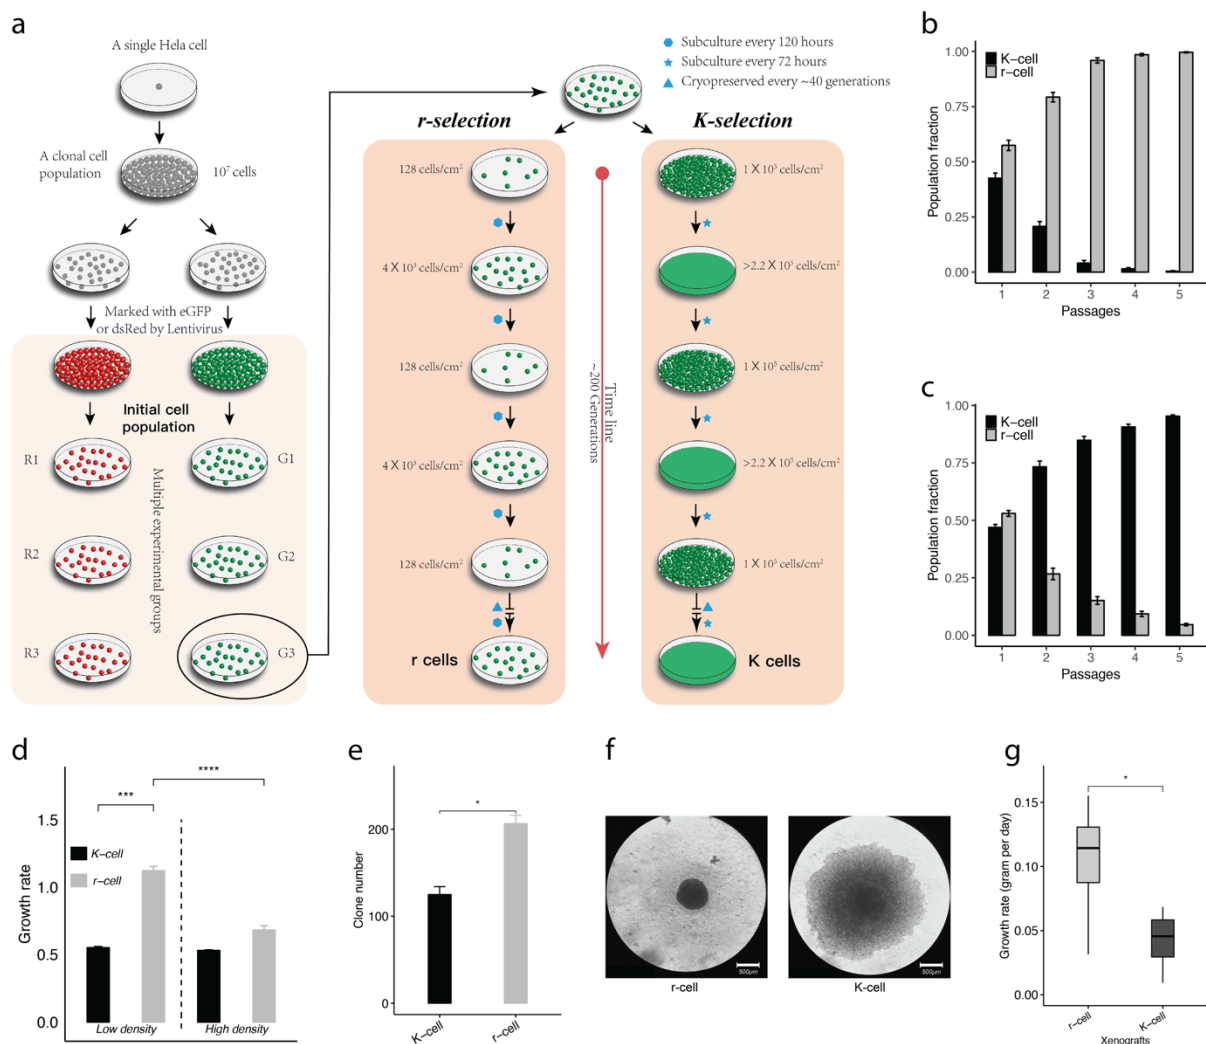

902

903 **Figure 1 | *r*- and *K*-selection in HeLa cells and their growth rate cells in 2D and 3D**  
 904 **cultures. a) *r*- and *K*-selection strategies.** An initial single cell clone was split into six  
 905 populations, with three labeled with dsRed (R; red dots) and three with eGFP (G; green dots).  
 906 Each cell culture was passaged >200 times at low (*r*-selection) and high (*K*-selection)  
 907 density. **Fitness tests were performed at b) low and c) high density.** The Y-axis is the  
 908 proportion of *r* and *K* cells estimated by flow cytometry during five passages (x-axis) of *r*-*K*-  
 909 mixed cell cultures. **d) The growth rate of *r* and *K* cells across culture conditions.** Cells in  
 910 111 *r*- and 141 *K*-cell clones were counted every 24 hours. Growth rate is calculated based on  
 911 cell number change within seven days. **The tumorigenicity of *r* and *K* cells is presented**  
 912 **based on the number e) and size f) of tumor clones in a soft agar assay on the 7th 21st**  
 913 **day. g) The growth rate of *r*- and *K*-cell xenografts.** Error bars represent standard  
 914 deviations. Dash lines separate culture conditions or strategies. Error bars represent standard  
 915 deviations. Student's t-test: \*P<0.05, \*\*P<0.01, \*\*\*P<0.005, \*\*\*\*P<0.0001. Scale bars in f)  
 916 represent 500 μm. n= 3 independent experiments per population in b), c), d), and e); n= 12  
 917 xenografts in g). mean ± SD.

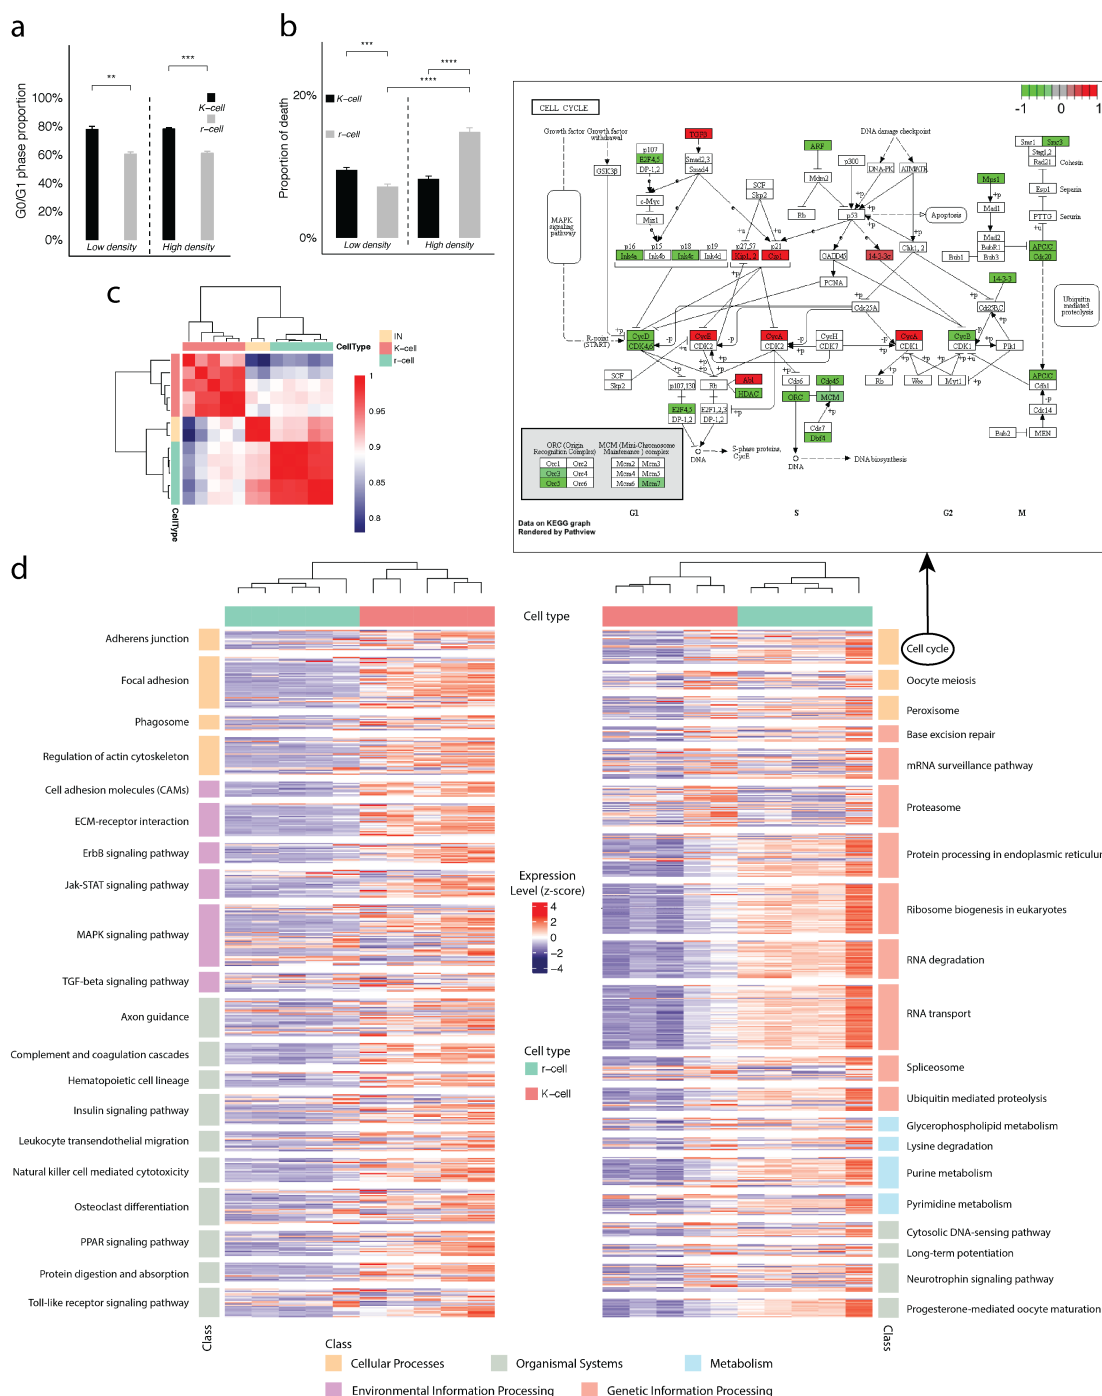

918  
919  
920  
921  
922  
923  
924  
925  
926  
927  
928  
929  
930

**Figure 2 | Differences in cell cycle, cell death and gene expression between *r* and *K* cells.**  
**a) The G0/G1 phase proportion and b) the proportion of cell death** in *r* (gray) and *K* cells (black) are analyzed using PI and Annexin V staining via flow cytometry under high- and low-density conditions. Dashed lines separate culture conditions. Error bars represent standard deviations. Student's t-test: \* $P < 0.05$ , \*\* $P < 0.01$ , \*\*\* $P < 0.005$ , \*\*\*\* $P < 0.0001$ .  $n = 3$  independent experiments per population. **c) Gene expression correlation between IN, *r*-, and *K*-cell populations.** **d) Pathways that show significantly different expression between *r* and *K* cells.** The left panel presents signaling pathways that are overexpressed in five *K*-cell populations (pink), the right presents pathways overexpressed in five *r*-cell populations (green). The z-score heatmap indicates the scale of gene expression difference. The upper panel shows the cell cycle pathway with relatively over- (red) and under- (green) expressed genes in *r* vs. *K* cells highlighted.

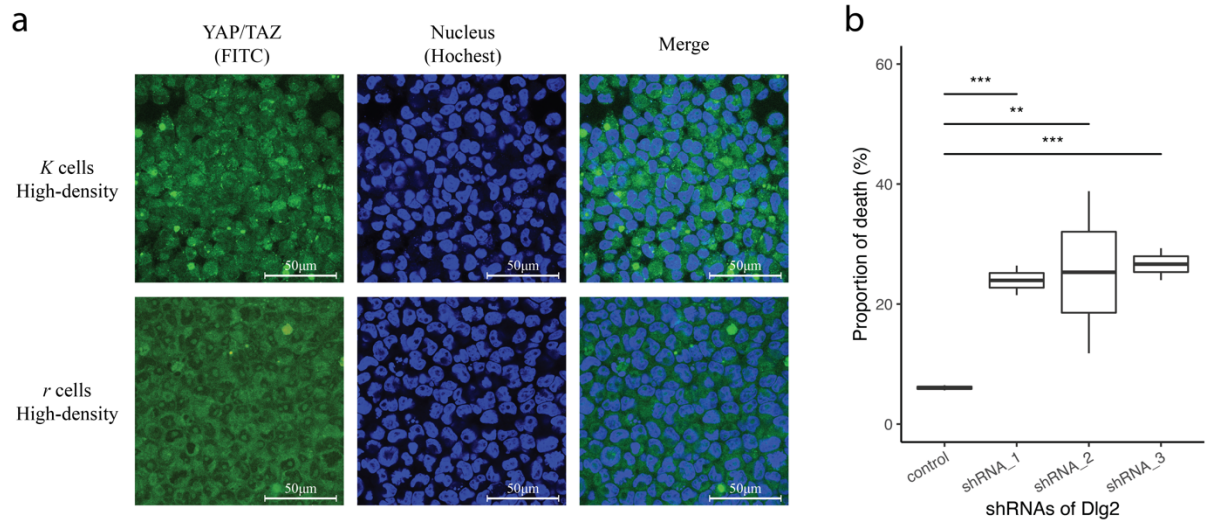

931  
932  
933  
934  
935  
936  
937  
938

**Figure 3 | YAP/TAZ colocalization in *r* and *K* cells under high density and the effect of Dlg-2 knock-down in *K* cells. a) YAP/TAZ colocalization in the cytoplasm and nuclei under high density. YAP/TAZ was immunofluorescently stained with FITC. Hoechst staining marks nuclei. Scale bars represent 50 $\mu$ m. b) The proportion of cell death in Dlg-2 knockdown *K* cells under high density. The death rate was measured by Annexin V staining via flow cytometry. Student's *t*-test: \* $P < 0.05$ , \*\* $P < 0.01$ , \*\*\* $P < 0.005$ .  $n = 8$  independent experiments per population mean  $\pm$  SD.**

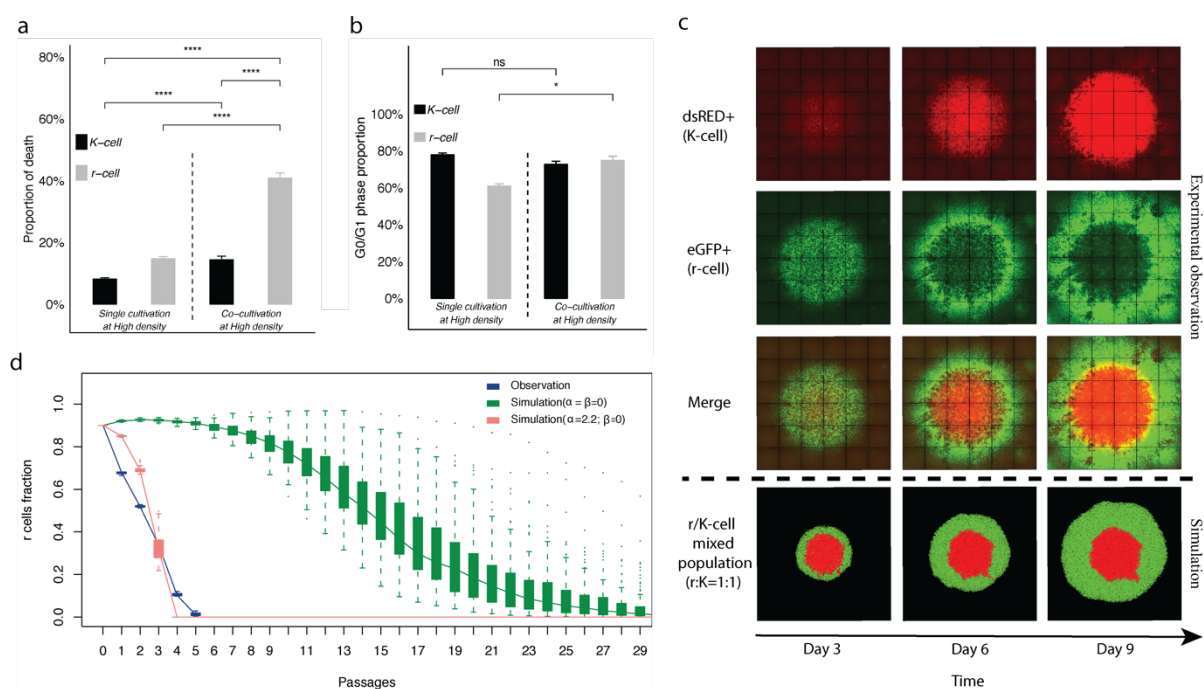

939  
 940 **Figure 4 | Inter-population interaction and temporal and spatial growth of r and K cells**  
 941 **in mixed populations. a) Cell death and b) G0/G1 phase proportion of r and K cells in**  
 942 **individual and mixed cultures.** The y-axis in a) and b) shows death rates and G0/G1 phase  
 943 proportion of r (gray) and K (black) cells. Death rates were measured by Annexin V staining.  
 944 G0/G1 phase proportions were measured by PI staining via flow cytometry. Cells were  
 945 cultured alone or co-cultivated at high density. Dashed lines separate culture strategies. Error  
 946 bars represent standard deviations. Student's t-test: ns: non-significant, \* $P < 0.05$ ,  
 947 \*\*\*\* $P < 0.0001$ .  $n = 3$  independent experiments per population. **c) Spatial structure in an r-K**  
 948 **mixed population.** K and r cells are well mixed in equal proportion and seeded in the center  
 949 of a six-well plate with total cell number  $\sim 10^6$ . Each column represents time points from  
 950 day 3 to day 9 after cell seeding. r and K cells are eGFP and dsRed positive shown in green  
 951 and red, respectively. The top and bottom panels show the spatial distribution of r and K cells  
 952 in empirical observations and computer simulations, respectively. **d) The distribution of r**  
 953 **cell fractions estimated in vitro (blue) and in silico (red ( $\alpha = 2.2, \beta = 0$ ) and green ( $\alpha = \beta = 0$ )).**  
 954 The co-culture of r and K cells is initiated with r/K ratio of 9:1. The y-axis reflects the  
 955 fraction of r cells in the co-culture; x-axis represents cell passages. ( $n = 100$  stochastic  
 956 simulations per population;  $n = 3$  independent experiments; mean  $\pm$  SD).

957  
 958  
 959

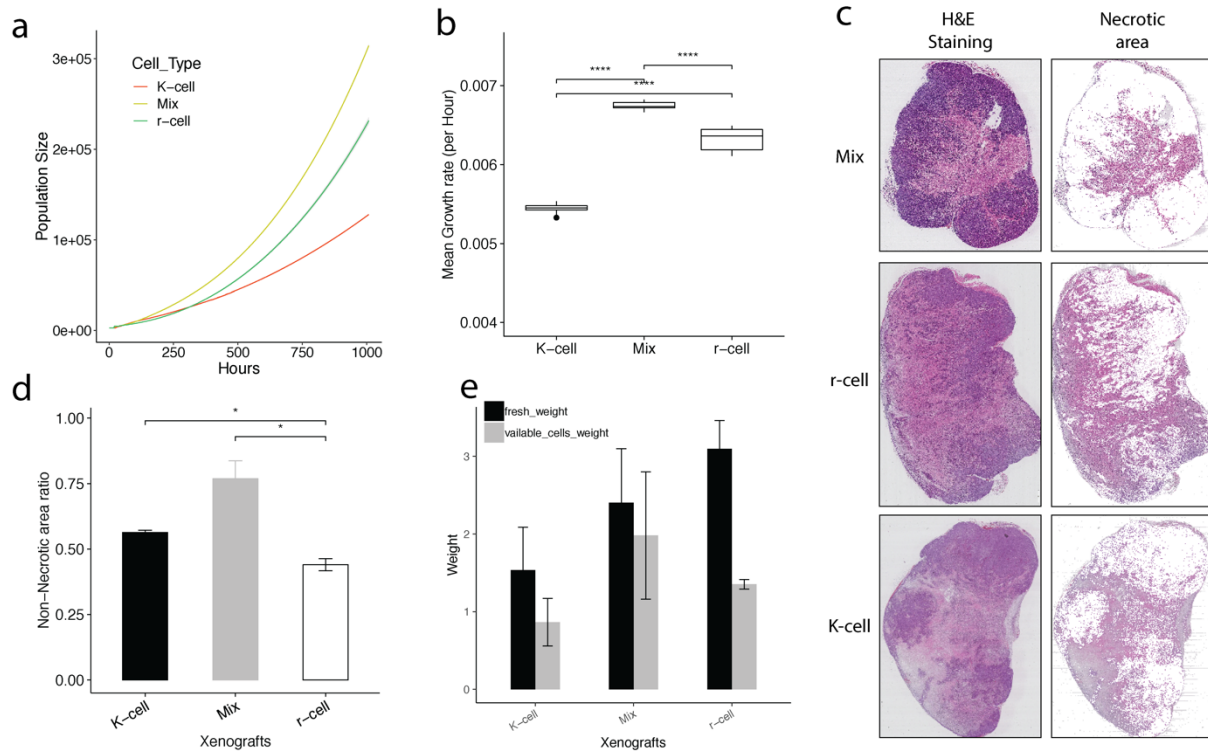

960  
 961  
 962  
 963  
 964  
 965  
 966  
 967  
 968  
 969  
 970  
 971  
 972

**Figure 5 | Population fitness of r, K, and r/K mixtures. a) Growth curves for different populations from the spatial computational model.** The yellow line represents the r-cell population, the green line represents the mixture population of r- and K- cells and the red line represents the K-cell population. The Y-axis represents population size. The X-axis represents time. (n = 100 stochastic simulations per population; mean ± SD). **b) Mean growth rate comparison among populations.** The growth rate was measured at 1 hour intervals. The Y-axis represents mean growth rate. The X-axis represents time. (n = 100 stochastic simulations per population; mean ± SD, Student's t-test: \*\*\*\*P<0.0001). **c) Necrotic area detection.** The second column represents the necrotic area in xenografts. **d) Proportion of the non-necrotic area (y-axis) in xenografts.** **e) Whole tumor (black) and viable cell (gray) weight in xenografts.** The xenografts were extracted at the sixth week after cell inoculation. n=6 for each xenograft type; Student's t-test: \*P<0.05, \*\*\*\*P<0.0001.



973

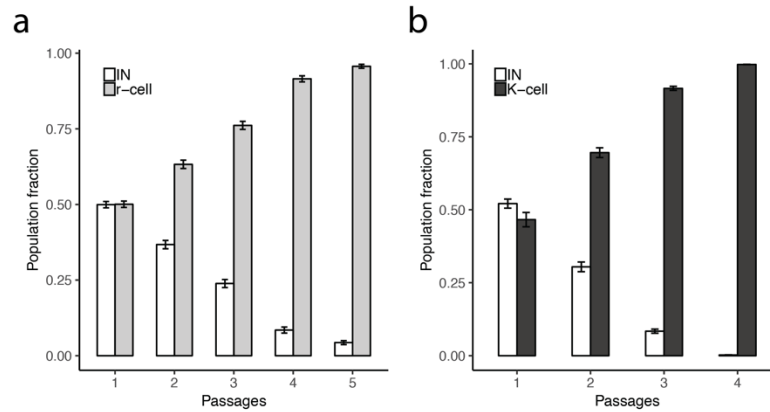

974

975

976

977

978

979

980

981

**Extended Data Figure 1 | Fitness, growth, and apoptosis rates of r- and K-cells in 2D and 3D environments.** IN cells and the a) r-cells or b) K-cells were mixed together at equal amounts at the beginning. The mixed populations were cultured under normal culture conditions. The proportion of each type of cells was measured by flow cytometry every two days during subculture. Error bars represent standard deviations. N= 3 independent experiments per population, mean  $\pm$  SD.



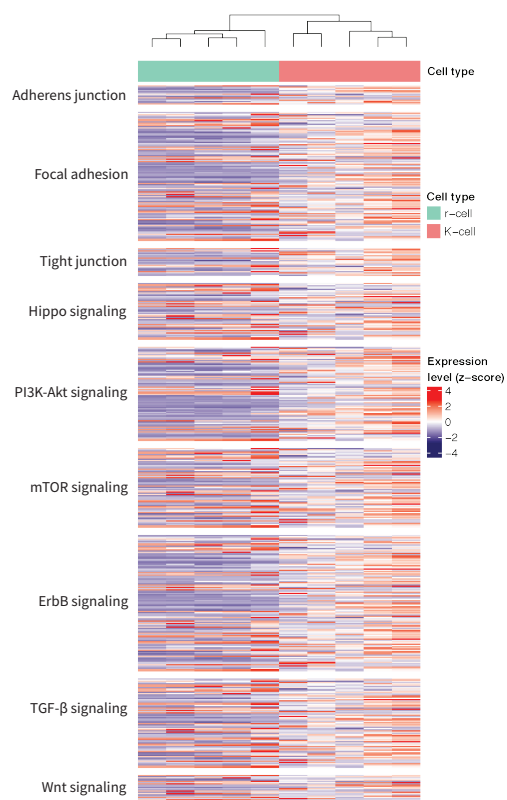

982  
983  
984

Extended Data Figure 2 | Cluster of Hippo-related pathways.

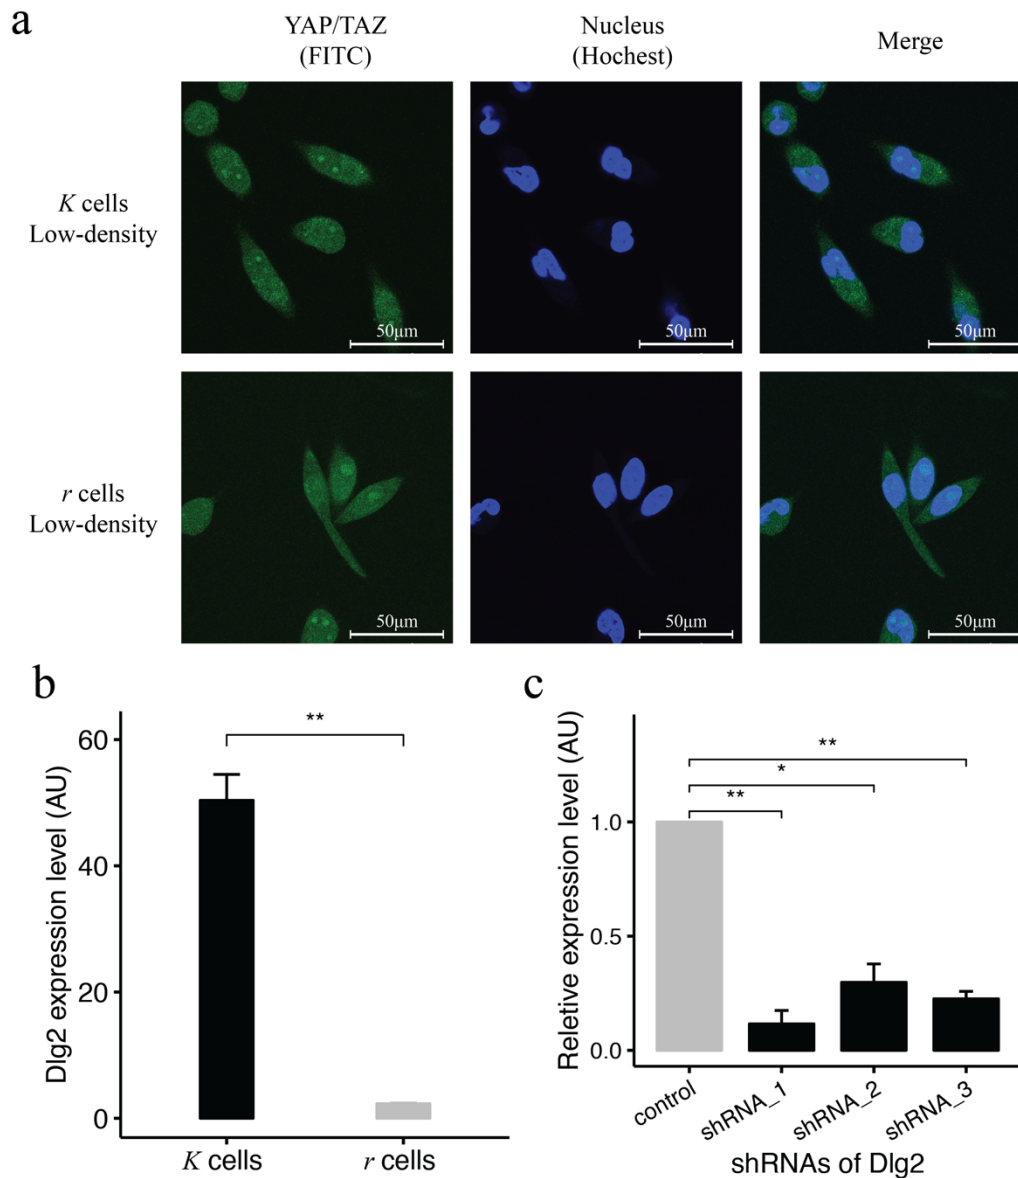

985  
986  
987  
988  
989  
990  
991  
992

**Extended Data Figure 3 | YAP/TAZ colocalization in *r* and *K* cells under low density and shRNA knockout of Dlg-2 in *K* cells.** a) YAP/TAZ colocalization in the cytoplasm and nuclei at low density. YAP/TAZ were stained with FITC by immunofluorescence. Positive Hoechst staining marks nuclei. Scale bars represent 50µm. b) The expression level of Dlg-2 in *r* and *K* cells at high density by q-PCR. c) Dlg-2 shRNA in *K* cells. Three shRNAs were used for the Dlg-2 knockdown. n=3 independent experiments per population, mean ± SD.

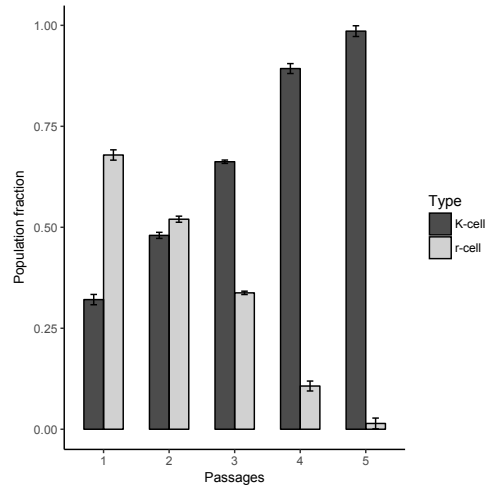

993

994 **Extended data Figure 4 | Observed dynamics of mixed populations initiated with 90%**  
995 **r-cells and 10% K-cells.** Mixed populations were cultured under K-selection. The proportion  
996 of each type of cells was measured by flowcytometry every three days during. The bars  
997 represent the proportion change of cell population by time. The grey bars represent r- and  
998 black bars K-cells. The x-axis represents subculture times, the y-axis represents cell-type  
999 proportions. Three replicates were performed on each assay. Error bars represent standard  
1000 deviations. n=3 independent experiments per population, mean  $\pm$  SD.

1001

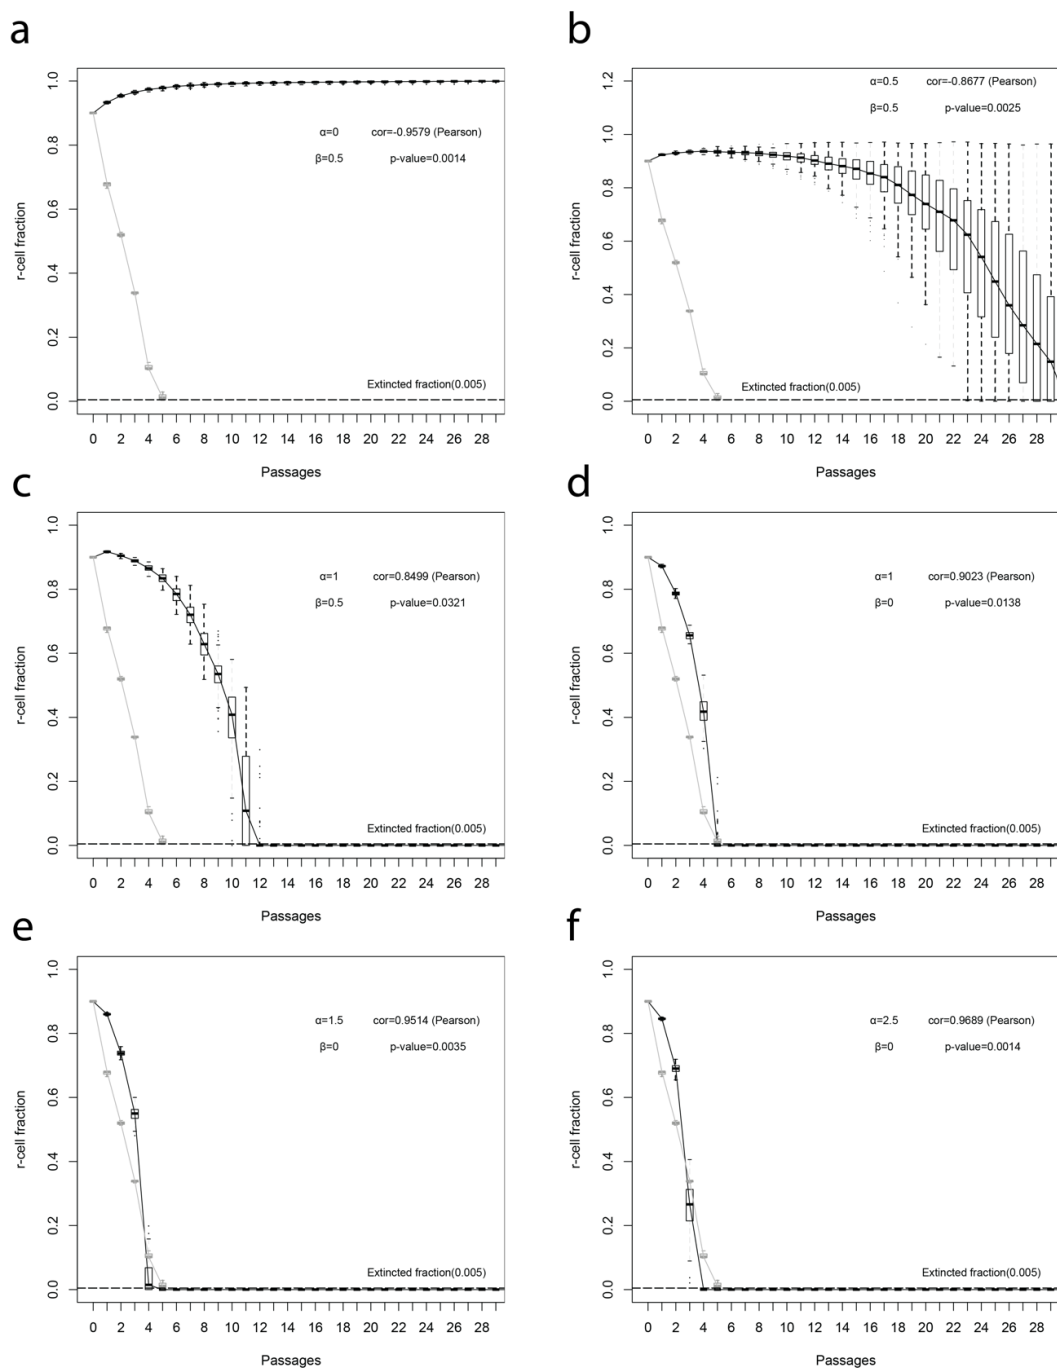

1002

1003 **Extended Data Figure 5 | Predicted dynamics of r- and K-cell mixed populations.** The  
 1004 proportion of each type of cells in the population was measured when subculturing. Sub-  
 1005 figures show the predicted population dynamics with different  $\alpha$  and  $\beta$ . Black boxes and lines  
 1006 represent simulation results. Gray boxed and lines represent observations.  $n = 100$  stochastic  
 1007 simulations per population,  $n = 3$  independent experiments per population, mean  $\pm$  SD.

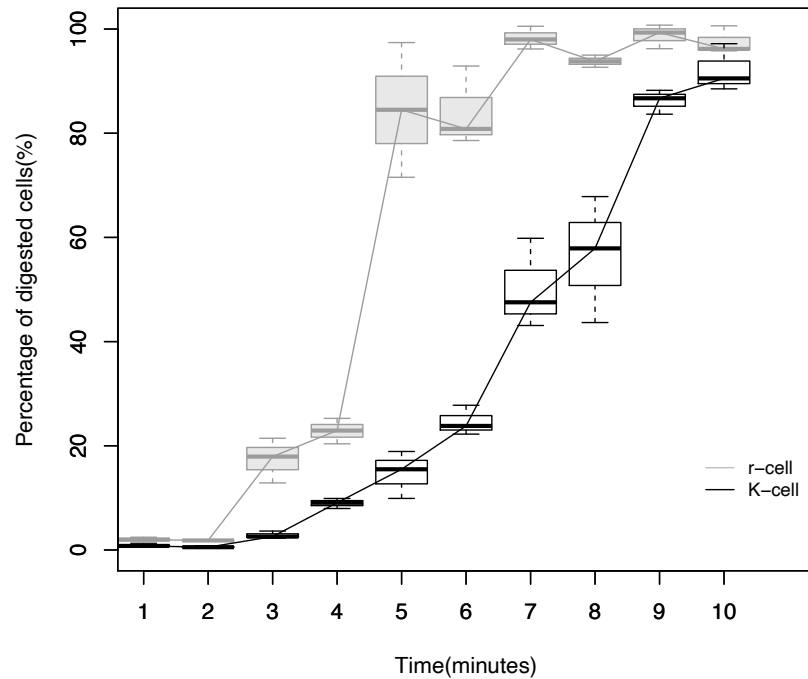

1008  
1009

1010 **Extended Data Figure 6 | Detachment curves of r- and K-cells under trypsinization.**

1011 Cells were digested by 1X Trypsin under room temperature. Cells which detached under  
1012 trypsinization were counted every minute. The x-axis represents time and the y-axis  
1013 represents the proportion of total cells that have been digested. Grey lines and box diagrams  
1014 represent observations of r-cell populations. Black lines and box diagrams represent  
1015 observations of K-cell populations. n= 6 independent experiments per population, mean  $\pm$   
1016 SD. This figure shows that it takes significantly longer to digest attached K than r cells.

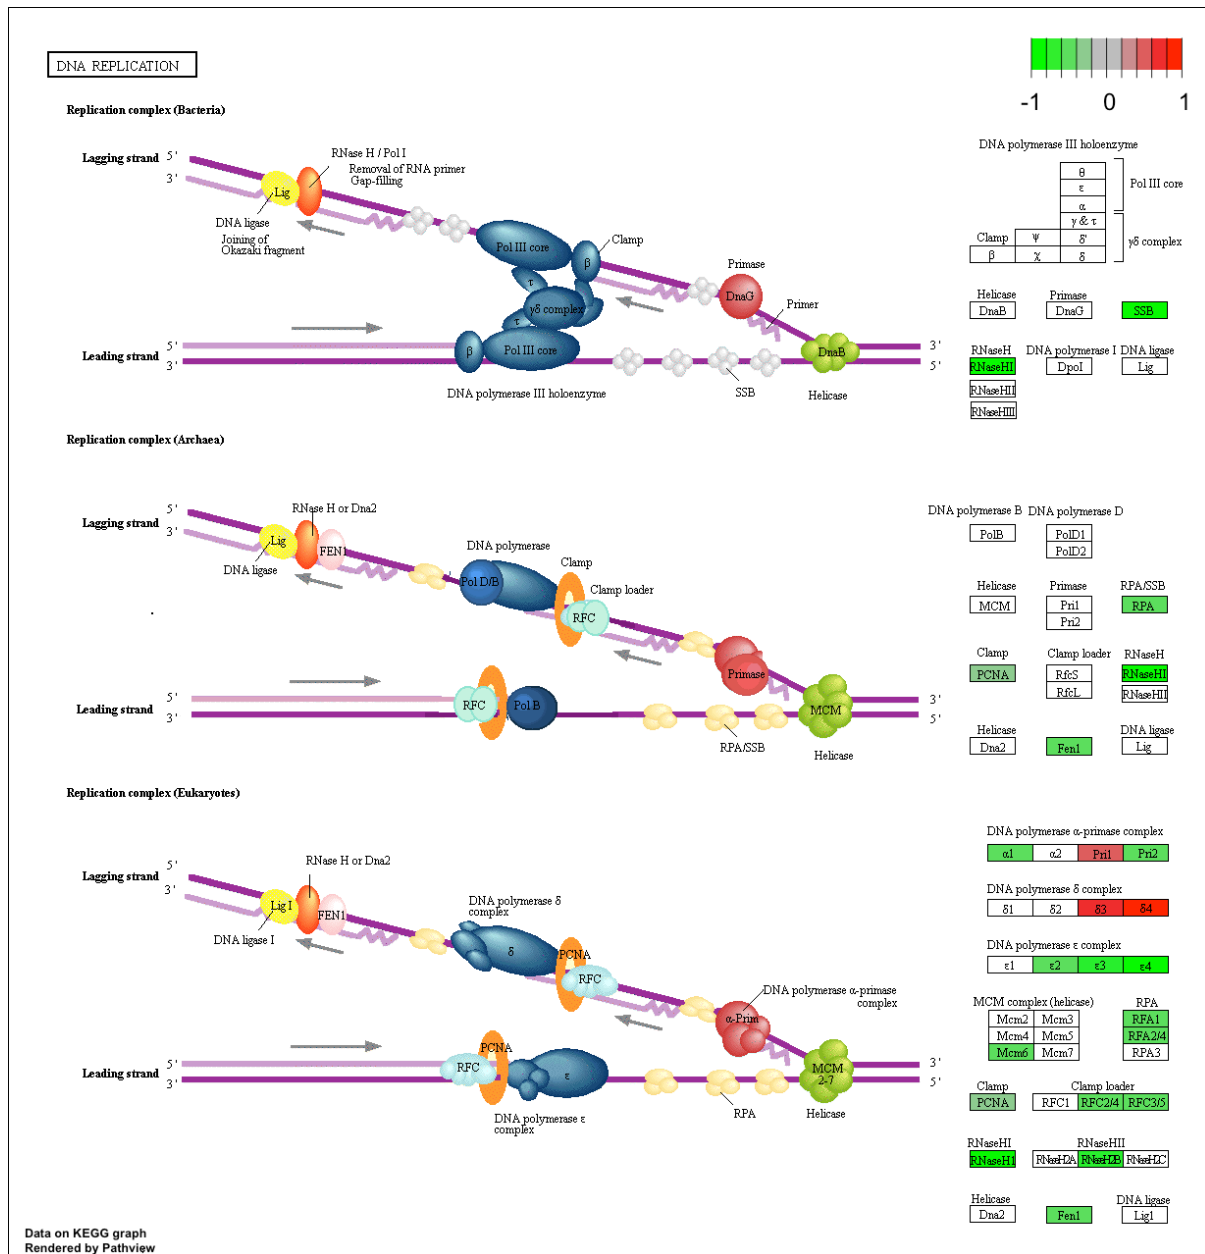

1017  
1018  
1019  
1020

**Extended Data Figure 7 | The DNA replication pathway is significantly lower expressed in r cells under high than under low density.**





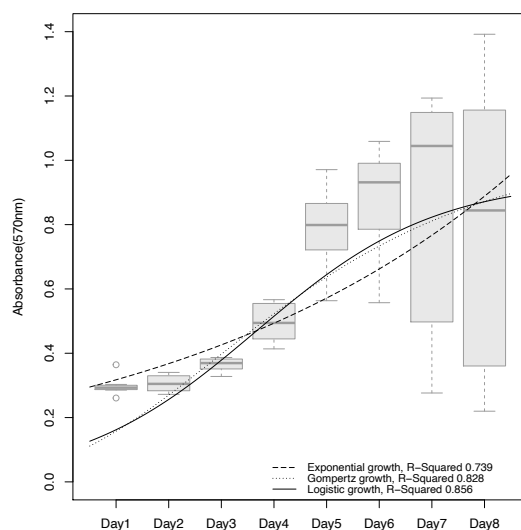

1025  
1026  
1027  
1028  
1029

**Extended data Figure 9 | Growth model fitting.** Cell growth was calculated using the MTT cell proliferation assay. We take the absorbance at 570 nm as the relative cell number. The assay was performed over eight days. We chose three population growth models: exponential, Gompertz, and logistic. Curves represent different models' predictions.

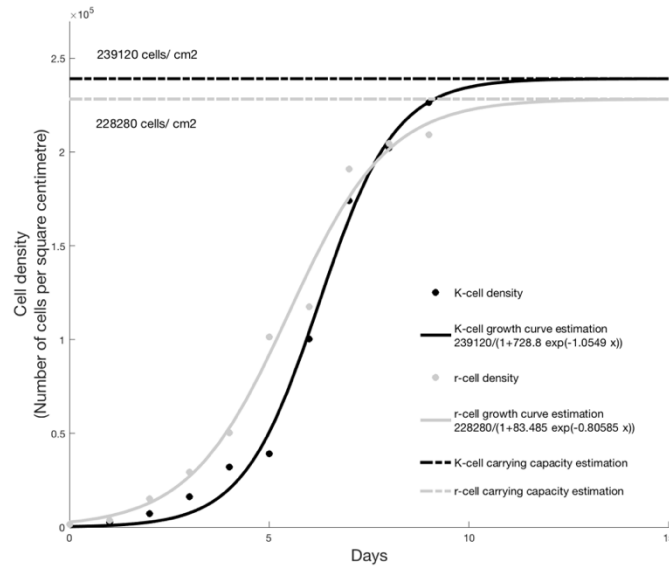

1030 **Extended Data Figure 10 | Carrying capacity estimation.** The X-axis represents days after  
1031 cell seeding. The Y-axis represents cell density. The unit of cell density is the number of cells  
1032 per square centimeter. Grey points represent the cell density of r- and black points of K cells.  
1033 Data were collected from experiments. Solid grey and solid black lines represent estimated  
1034 growth curves of r- and K-cell populations respectively. Curve fitting was based on a logistic  
1035 growth function. Parameters are shown in the legend. Adjusted  $R^2$  of the r-cell growth curve  
1036 estimation is 0.985, for K-cells it is 0.991. The P-value of the r-cell growth curve is  
1037  $2.21 \times 10^{-8}$  and for K-cell it is  $6.4 \times 10^{-9}$ . The estimate of the carrying capacity is  
1038 239120 cells/cm<sup>2</sup> for r- and 228280 cells/cm<sup>2</sup> for K cells.

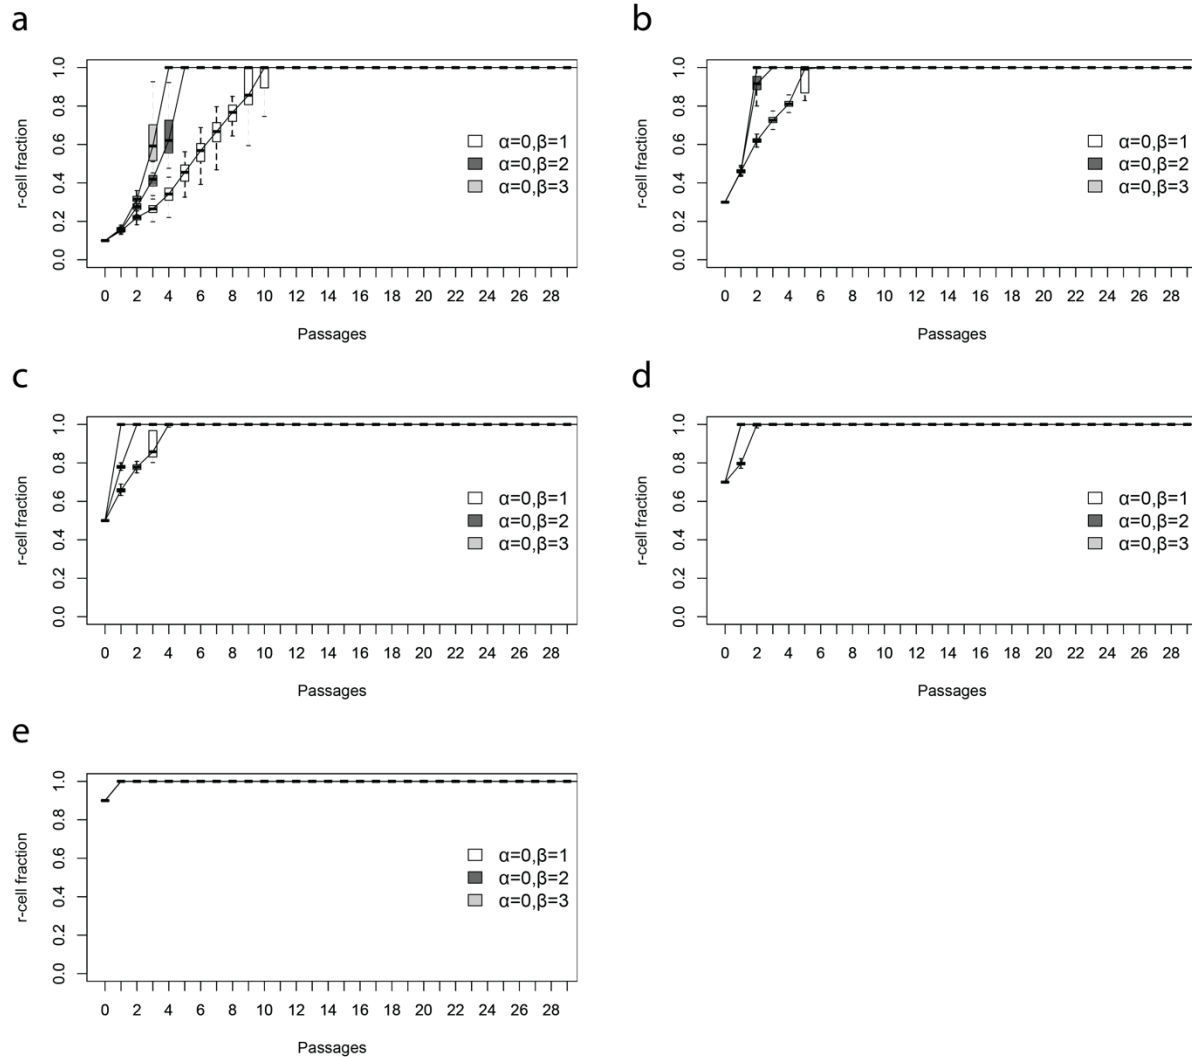

1039

1040 **Extended Data Figure 11 | Predicted dynamics of r- and K-cell mixed populations.** The  
1041 mixed populations were cultured under high density based on the density dependent  
1042 population growth model. The populations were initialed with cell density of  
1043  $4 \times 10^4$  cells/cm<sup>2</sup> and subcultured every 72 hours. The proportion of r cells is a) 10%, b)  
1044 30%, c) 50%, d) 70% e) 90% at the beginning. The proportion of each type of cells in a  
1045 population was measured when subculturing. n = 100 stochastic simulations per population;  
1046 mean  $\pm$  SD.

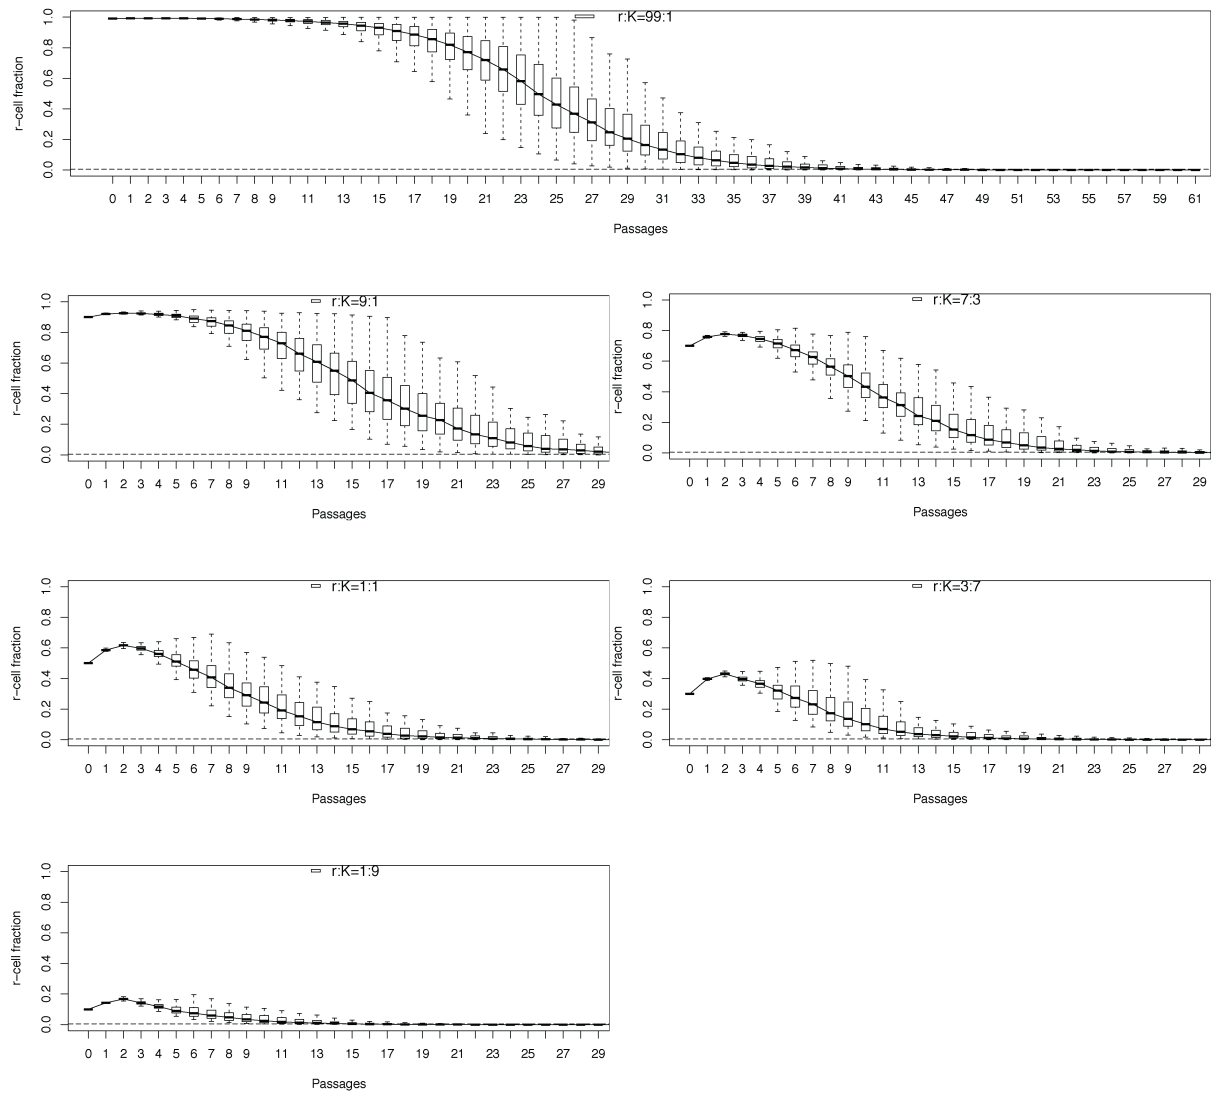

1047  
1048

1049 **Extended Data Figure 12 | The dynamics of r- and K-cell mixture populations.** Each  
1050 panel shows 100 simulation predictions of a mixture population with a certain initial r and K  
1051 cells ratio. The x-axis represents the passage times and the y-axis represents the r-cell  
1052 fraction.

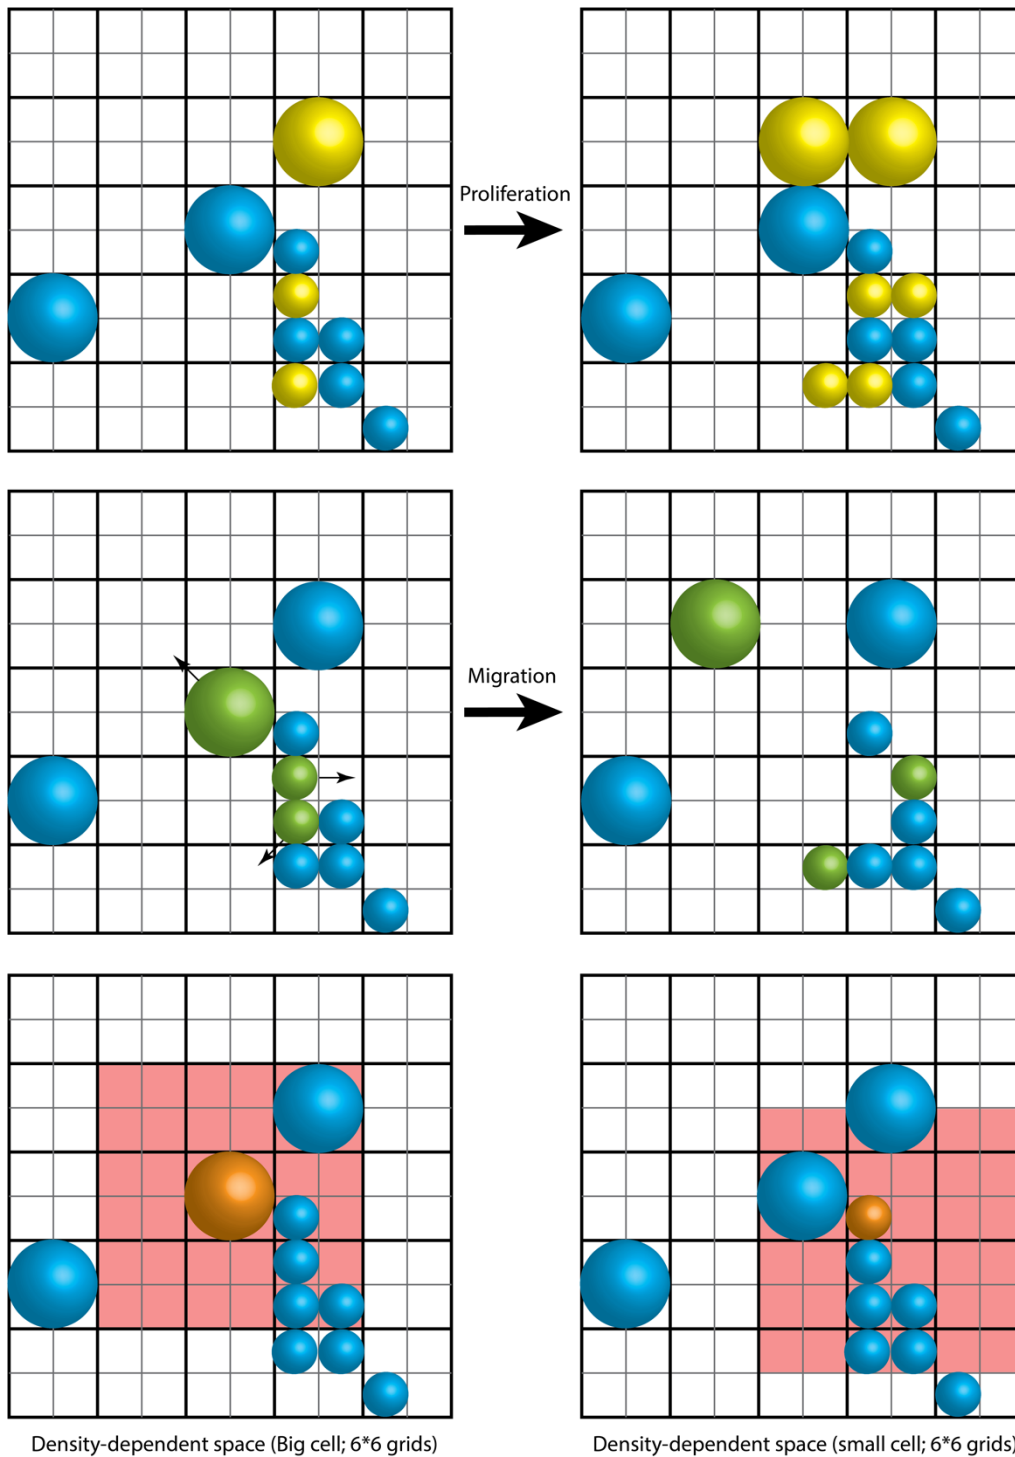

1053  
1054  
1055  
1056  
1057  
1058  
1059

**Extended Data Figure 13 | The spatial computational model of population growth.** The cell growth space was assumed to be a two-dimensional planar grid. The location of cells is determined by grid coordinates. Cell migration and division are on the two-dimensional grid plane. The first line represents the division process. Yellow cells are undergoing mitosis. The second row represents migration with migrated cells in green. The red regions in the third row represent density dependent regions of migrated cells (orange).

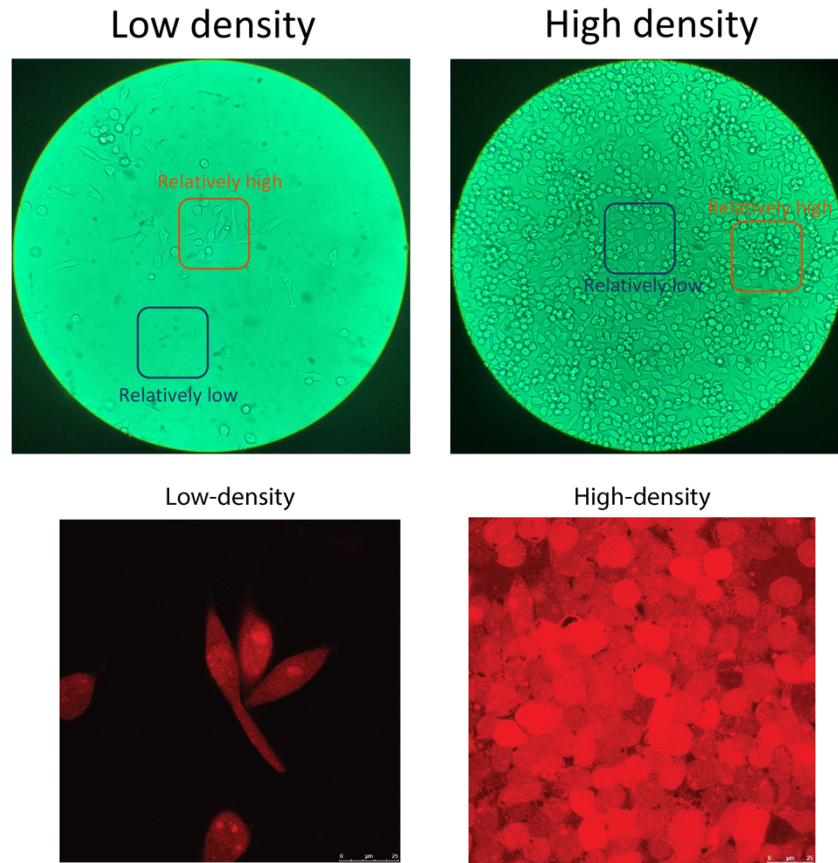

**Extended Data Figure 14 | Density-dependent spatial heterogeneity and cell size**

Upper: Images show density-dependent spatial heterogeneity across culture densities: low density on the left and high density on the right.

Bottom: Fluorescence imaging of cells at two densities. Red marks cell bodies. On the left is the image of cells growing under low density and on the right under high.

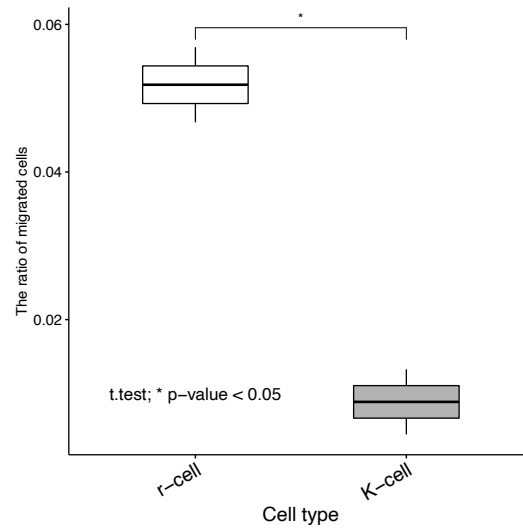

1067  
1068  
1069  
1070

**Extended Data Figure 15. Ratio of migrated cells.** r cells migrate more readily than K cells (t-test). The data were collected using a trans-well migration assay. n = 6 independent experiments; mean  $\pm$  SD.



1071 **Extended Data Table 1 | The number of DEGs across comparisons.**

1072

1073

1074

| Comparisons | High-expressed genes number | Low-expressed genes number | Total DEGs number |
|-------------|-----------------------------|----------------------------|-------------------|
| KL vs. rL   | 1748                        | 1413                       | 3161              |
| KH vs. KL   | 1151                        | 1126                       | 2277              |
| rH vs. rL   | 3284                        | 3098                       | 6382              |

1075

1076 **Extended Data Table 2 | Enrichment of DEGs in r- and K-cells under low-density.**

| KEGG Pathway                        | Count | %   | P-Value  |
|-------------------------------------|-------|-----|----------|
| Spliceosome                         | 54    | 1.7 | 1.00E-10 |
| Pathways in cancer                  | 97    | 3.1 | 2.90E-05 |
| Ribosome biogenesis in eukaryotes   | 30    | 1   | 9.70E-05 |
| Small cell lung cancer              | 29    | 0.9 | 1.60E-04 |
| Hepatitis B                         | 40    | 1.3 | 1.10E-03 |
| PI3K-Akt signaling pathway          | 79    | 2.5 | 2.00E-03 |
| ECM-receptor interaction            | 26    | 0.8 | 3.20E-03 |
| RNA transport                       | 43    | 1.4 | 5.20E-03 |
| Proteasome                          | 15    | 0.5 | 9.50E-03 |
| Base excision repair                | 12    | 0.4 | 1.40E-02 |
| p53 signaling pathway               | 19    | 0.6 | 2.30E-02 |
| Amoebiasis                          | 27    | 0.9 | 2.30E-02 |
| Epstein-Barr virus infection        | 43    | 1.4 | 2.80E-02 |
| Pyrimidine metabolism               | 26    | 0.8 | 3.20E-02 |
| Hippo signaling pathway             | 35    | 1.1 | 3.50E-02 |
| Axon guidance                       | 30    | 1   | 4.20E-02 |
| Cell cycle                          | 29    | 0.9 | 5.10E-02 |
| Arginine and proline metabolism     | 14    | 0.4 | 6.10E-02 |
| Amyotrophic lateral sclerosis (ALS) | 14    | 0.4 | 6.10E-02 |
| Influenza A                         | 38    | 1.2 | 6.30E-02 |
| Pertussis                           | 19    | 0.6 | 6.30E-02 |
| AMPK signaling pathway              | 28    | 0.9 | 6.70E-02 |
| Purine metabolism                   | 38    | 1.2 | 7.20E-02 |
| RNA degradation                     | 19    | 0.6 | 7.80E-02 |
| Complement and coagulation cascades | 17    | 0.5 | 9.90E-02 |

1077

1078 **Extended Data Table 3 | Top 25 pathways enriched in r- and K-cells under crowded**  
 1079 **culture.**

| Term                                        | Count | %          | PValue     | Fold Enrichment |
|---------------------------------------------|-------|------------|------------|-----------------|
| Proteasome                                  | 19    | 1.07344633 | 9.32E-09   | 4.89157973      |
| Spliceosome                                 | 34    | 1.92090395 | 2.58E-08   | 2.89584617      |
| RNA transport                               | 34    | 1.92090395 | 1.30E-05   | 2.23922989      |
| Oxidative phosphorylation                   | 26    | 1.46892655 | 2.03E-04   | 2.2144706       |
| Alzheimer's disease                         | 30    | 1.69491525 | 3.02E-04   | 2.02283372      |
| Ribosome biogenesis in eukaryotes           | 19    | 1.07344633 | 4.70E-04   | 2.47390239      |
| Huntington's disease                        | 32    | 1.8079096  | 6.32E-04   | 1.88797814      |
| Parkinson's disease                         | 24    | 1.3559322  | 0.00293437 | 1.91456938      |
| Non-alcoholic fatty liver disease (NAFLD)   | 25    | 1.41242938 | 0.00310229 | 1.87547498      |
| Epstein-Barr virus infection                | 29    | 1.63841808 | 0.00448698 | 1.72899051      |
| RNA polymerase                              | 9     | 0.50847458 | 0.00543855 | 3.18596311      |
| mRNA surveillance pathway                   | 17    | 0.96045198 | 0.00545382 | 2.11619528      |
| RNA degradation                             | 15    | 0.84745763 | 0.00669615 | 2.2067277       |
| Ribosome                                    | 22    | 1.24293785 | 0.00765604 | 1.83244937      |
| Pyrimidine metabolism                       | 18    | 1.01694915 | 0.00895992 | 1.96059269      |
| Lysosome                                    | 19    | 1.07344633 | 0.01859407 | 1.77875627      |
| Cytosolic DNA-sensing pathway               | 12    | 0.6779661  | 0.02280654 | 2.12397541      |
| Metabolic pathways                          | 128   | 7.23163842 | 0.02350298 | 1.18075506      |
| Herpes simplex infection                    | 25    | 1.41242938 | 0.03073077 | 1.54752307      |
| p53 signaling pathway                       | 12    | 0.6779661  | 0.03105377 | 2.02887203      |
| Protein export                              | 6     | 0.33898305 | 0.04640999 | 2.95509622      |
| Purine metabolism                           | 23    | 1.29943503 | 0.05854707 | 1.4803465       |
| Protein processing in endoplasmic reticulum | 22    | 1.24293785 | 0.0668094  | 1.47463382      |
| Lysine degradation                          | 9     | 0.50847458 | 0.08312794 | 1.96059269      |
| Synaptic vesicle cycle                      | 10    | 0.56497175 | 0.09925729 | 1.79807442      |

1080

1081 **Extended Data Table 4 |  $\alpha$  and  $\beta$  estimation.**

| $\alpha$ | $\beta$ | Pearson correlation coefficient | P-value    | $\alpha$   | $\beta$  | Pearson correlation coefficient | P-value         |
|----------|---------|---------------------------------|------------|------------|----------|---------------------------------|-----------------|
| 2.5      | 0       | 0.9689388                       | 0.00143221 | <b>2.2</b> | <b>0</b> | <b>0.972255</b>                 | <b>0.001144</b> |
| 2        | 0       | 0.9676702                       | 0.00155093 | 2.3        | 0        | 0.9707893                       | 0.00126744      |
| 1.5      | 0       | 0.9513884                       | 0.00348719 | 2.4        | 0        | 0.9692185                       | 0.00140667      |
| 3        | 0       | 0.9389382                       | 0.00547899 | 2.1        | 0        | 0.9681876                       | 0.00150194      |
| 0.5      | 0       | 0.9222155                       | 0.00884034 | 2          | 0        | 0.9678161                       | 0.00153704      |
| 2        | 0.5     | 0.9203873                       | 0.00925496 | 2.5        | 0        | 0.9666132                       | 0.00165341      |
| 1.5      | 0.5     | 0.9047305                       | 0.01318207 | 1.9        | 0        | 0.966591                        | 0.0016556       |
| 1        | 0       | 0.9023298                       | 0.01384333 | 2.6        | 0        | 0.9658321                       | 0.00173122      |
| 2.5      | 0.5     | 0.8532767                       | 0.03071229 | 1.8        | 0        | 0.9641388                       | 0.00190598      |
| 1        | 0.5     | 0.8498899                       | 0.03210835 | 2.7        | 0        | 0.9611661                       | 0.00223283      |
| 3        | 0.5     | 0.8459967                       | 0.03374926 | 1.7        | 0        | 0.959654                        | 0.00240886      |
| 3        | 1       | 0.4874954                       | 0.32668390 | 1.6        | 0        | 0.9552124                       | 0.00296398      |
| 0        | 0       | -0.2844327                      | 0.58485660 | 2.8        | 0        | 0.953362                        | 0.00321194      |
| 0        | 1       | -0.6824631                      | 0.13523590 | 1.5        | 0        | 0.9515176                       | 0.00346884      |
| 0        | 1.5     | -0.6824631                      | 0.13523590 | 2.9        | 0        | 0.9476675                       | 0.00403637      |
| 0        | 2       | -0.6824631                      | 0.13523590 | 3          | 0        | 0.9367681                       | 0.005871        |
| 0.5      | 1.5     | -0.6824631                      | 0.13523590 |            |          |                                 |                 |
| 0.5      | 2       | -0.6824631                      | 0.13523590 |            |          |                                 |                 |
| 1        | 1.5     | -0.6824631                      | 0.13523590 |            |          |                                 |                 |
| 1        | 2       | -0.6824631                      | 0.13523590 |            |          |                                 |                 |
| 1.5      | 1.5     | -0.6824631                      | 0.13523590 |            |          |                                 |                 |
| 1.5      | 2       | -0.6824631                      | 0.13523590 |            |          |                                 |                 |
| 2        | 1.5     | -0.6824631                      | 0.13523590 |            |          |                                 |                 |
| 2        | 2       | -0.6824631                      | 0.13523590 |            |          |                                 |                 |
| 2.5      | 1.5     | -0.6824631                      | 0.13523590 |            |          |                                 |                 |
| 2.5      | 2       | -0.6824631                      | 0.13523590 |            |          |                                 |                 |
| 3        | 1.5     | -0.6824631                      | 0.13523590 |            |          |                                 |                 |
| 3        | 2       | -0.6824631                      | 0.13523590 |            |          |                                 |                 |
| 2.5      | 1       | -0.8229516                      | 0.04424429 |            |          |                                 |                 |
| 0.5      | 0.5     | -0.8677189                      | 0.02509009 |            |          |                                 |                 |
| 0        | 0.5     | -0.9578561                      | 0.00262674 |            |          |                                 |                 |
| 2        | 1       | -0.9673633                      | 0.00158035 |            |          |                                 |                 |
| 1.5      | 1       | -0.9828175                      | 0.00044032 |            |          |                                 |                 |
| 1        | 1       | -0.9835389                      | 0.00040422 |            |          |                                 |                 |
| 0.5      | 1       | -0.9973591                      | 0.00001045 |            |          |                                 |                 |

1083 **Extended Data Table 5 | Single cell growth rate.**

| Single cell growth rate |            |            |            |            |            |            |
|-------------------------|------------|------------|------------|------------|------------|------------|
| Samples                 | IN G       | IN R       | H1G3KS     | H1R1KS     | H1G3RS     | H1R1RS     |
| 1                       | 1.18205451 | 0.9099664  | 1.05785739 | 0.4169925  | 1.1529676  | 1.36096405 |
| 2                       | 0.78450625 | 1.09276245 | 0.96578718 | 0.3        | 0.63894989 | 1.20447356 |
| 3                       | 0.68331135 | 0.92571359 | 0.40356018 | 1.20420227 | 1.35024631 | 1.26211361 |
| 4                       | 0.96146344 | 0.37275673 | 0.96610808 | 0.75038257 | 1.26650438 | 1.29541963 |
| 5                       | 0.69223035 | 0.97243412 | 1.17496324 | 0.73516754 | 1.24553979 | 1.35627194 |
| 6                       | 0.55066724 | 0.96347845 | 0.10820526 | 1.06598844 | 1.29776714 | 1.27910611 |
| 7                       | 1.11262124 | 0.65023927 | 0.64227275 | 1.33353816 | 1.3162349  | 1.29989319 |
| 8                       | 0.78234633 | 0.32142857 | 0.62534911 | 0.0830075  | 1.34890222 | 1.22927817 |
| 9                       | 0.85056211 | 0.60949718 | 0.40645792 | 1.2428491  | 1.06745604 | 1.25850872 |
| 10                      | 0.97209214 | 0.78990066 | 0.89551763 | 1          | 1.19063932 | 1.31476819 |
| 11                      | 0.69328098 | 0.09441166 | 0.3050203  | 0.29657843 | 1.29025241 | 0.74968538 |
| 12                      | 0.28188874 | 0.9669731  | 1.22090362 | 0.1169925  | 1.35733656 | 1.27015772 |
| 13                      | 1.06924641 | 0.93169468 | 0.03571429 | 0.14150375 | 1.27256068 | 1.34576374 |
| 14                      | 0.83532878 | 0.86647011 | 0.59787896 | 0.53219281 | 1.00358289 | 1.32127623 |
| 15                      | 0.90082758 | 0.95006167 | 0.90651607 | 1.15065555 | 1.24181886 | 1.3181352  |
| 16                      | 1.12741936 | 1.16930541 | 0.38410313 | 1.09248125 | 1.34462084 | 1.38411497 |
| 17                      | 0.94026379 | 1.01658765 | 0.16374866 | 1.03257973 | 1.11478234 | 1.09955316 |
| 18                      | 1.22249553 | 1.03685187 | 1.13752093 | 0.99068906 | 1.24553253 | 1.51453513 |
| 19                      | 0.70769319 | 0.99006821 | 0.52363493 | 1.11065629 | 1.25292585 | 1.14394413 |
| 20                      | 0.3090178  | 0.57221968 | 0.69534322 | 0.95216004 | 1.20452535 | 0.80808175 |
| 21                      | 0.20838377 | 1.06415693 | 0.74422446 | 1.25041672 | 1.3004986  | 0.35686687 |
| 22                      | 1.04414208 | 0.71627403 | 0.10714286 | 1          | 1.20976265 | 1.34431378 |
| 23                      | 0.81863137 | 1.01558597 | 0.3187433  | 1.18371023 | 0.5992702  | 0.9137845  |
| 24                      | 0.77428678 | 0.69809307 | 0.98152095 | 0.79366379 | 1.19494849 | 1.38846475 |
| 25                      | 0.95431981 | 0.61747098 | 1.14700834 | 0.37598882 | 1.11092661 | 1.49837062 |
| 26                      | 1.06200509 | 1.05243698 | 1.04377307 | 0.1169925  | 0.11321161 | 1.45951409 |
| 27                      | 1.17748589 | 0.85243595 | 1.04125522 | 0.35108335 | 1.21091295 | 1.26717622 |
| 28                      | 1.02449193 | 0.9846867  | 0.35633143 | 0.54431378 | 1.23501737 | 1.43353816 |
| 29                      | 0.70446769 | 0.82035446 | 0.56899428 | 0.19967234 | 1.23319832 | 0.45395466 |
| 30                      | 0.65930187 | 0.68832903 | 1.04866898 | 0.99772799 | 1.32590857 | 0.2        |
| 31                      | 0.8158403  | 0.55060698 | 0.33996806 | 0.15849625 | 0.8263962  | 0.62407913 |
| 32                      | 0.92821544 | 1.03767951 | 1.20698559 | 0.5        | 0.11595502 | 1.50891297 |
| 33                      | 0.90263343 | 0.95049219 | 0.89434196 | 0.2299685  | 1.23633227 | 0.62419087 |
| 34                      | 0.74990959 | 0.40670889 | 0.46312742 | 0.9194603  | 1.07652077 | 1.37139771 |
| 35                      | 1.30573712 | 0.86764158 | 0.98416201 | 0.1169925  | 1.29667389 | 1.21301415 |
| 36                      | 0.57407648 | 1.00402174 | 0.77471437 | 1.19858419 | 0.97046398 | 1.39163564 |
| 37                      | 0.69373464 | 1.08973541 | 1.26907276 | 1.06438562 | 1.30892878 | 1.42041182 |
| 38                      | 0.86274954 | 0.57086811 | 0.37654    | 1.23151496 | 1.30859543 | 1.28812369 |
| 39                      | 1.11052423 | 0.19070893 | 0.80118862 | 1.1019417  | 1.11123277 | 1.30429845 |
| 40                      | 1.16363931 | 0.68239273 | 0.73597283 | 0.59188632 | 1.34714326 | 1.24576374 |
| 41                      | 0.31025775 | 0.70440812 | 1.17714937 | 1.09858419 | 1.30414223 | 1.06800298 |
| 42                      | 1.09899887 | 1.03028933 | 0.93832419 | 0.9509775  | 0.83086675 | 1.30887882 |
| 43                      | 1.02120064 | 0.77007585 | 0.9203289  | 0.40808175 | 1.33986971 | 1.53174597 |
| 44                      | 1.06970496 | 0.75111087 | 0.87874437 | 0.2        | 0.31939515 | 1.49887069 |
| 45                      | 0.41965783 | 0.75696406 | 0.7838964  | 1.12753486 | 1.20365572 | 0.38846475 |
| 46                      | 0.68318868 | 1.00157957 | 0.94014636 | 0.5169925  | 1.30990997 | 1.42316337 |
| 47                      | 1.11510448 | 0.97776    | 0.51172694 | 0.75038257 | 1.18687715 | 1.21357093 |

|    |            |            |            |            |            |            |
|----|------------|------------|------------|------------|------------|------------|
| 48 | 0.35658708 | 0.78473438 | 0.9950518  | 0.3        | 1.20095467 | 0.44576374 |
| 49 | 0.5841186  | 0.96386567 | 0.32020658 | 0.26767629 | 1.34738565 | 1.2258566  |
| 50 | 0.6865186  | 0.26844754 | 0.21428571 | 0.933985   | 0.94737447 | 0.67234    |
| 51 | 0.99740186 | 0.23728058 | 0.02696027 | 0.8        | 1.14735149 | 0.9950518  |
| 52 | 0.2343992  | 1.26351184 | 1.04299544 | 0.8        | 0.78302047 | 1.15481502 |
| 53 | 0.16042332 | 0.78684039 | 1.11587849 | 0.99083926 | 1.12030475 | 0.34330054 |
| 54 | 0.81002746 | 0.60953941 | 0.21428571 | 0.81032878 | 0.2947848  | ----       |
| 55 | 0.28893487 | 1.07336619 | 0.14285714 | 0.90947375 | ----       | ----       |
| 56 | ----       | 0.99543854 | 0.95528537 | 0.96232719 | ----       | ----       |
| 57 | ----       | 0.81517588 | 0.10714286 | 0.3        | ----       | ----       |
| 58 | ----       | 1.26762588 | 0.92306393 | 1.06219946 | ----       | ----       |
| 59 | ----       | 0.60449721 | 0.94750032 | 0.88137812 | ----       | ----       |
| 60 | ----       | 0.9382225  | 0.19946295 | 1.11357093 | ----       | ----       |
| 61 | ----       | 0.68801814 | 0.19946295 | 0.96211361 | ----       | ----       |
| 62 | ----       | 1.00723175 | 0.21428571 | 0.04150375 | ----       | ----       |
| 63 | ----       | 0.73484628 | 0.33963482 | 1.26800298 | ----       | ----       |
| 64 | ----       | 0.62672214 | 0.67506152 | 0.51083347 | ----       | ----       |
| 65 | ----       | 0.82513271 | 0.36921685 | 0.05849625 | ----       | ----       |
| 66 | ----       | 0.85640135 | ----       | 0.0509775  | ----       | ----       |
| 67 | ----       | 0.94903135 | ----       | 0.2        | ----       | ----       |
| 68 | ----       | 0.78134801 | ----       | 0.12288187 | ----       | ----       |
| 69 | ----       | 0.09838884 | ----       | 0.82288187 | ----       | ----       |
| 70 | ----       | 0.80426275 | ----       | 0.76617781 | ----       | ----       |
| 71 | ----       | 0.26280965 | ----       | 0.3        | ----       | ----       |
| 72 | ----       | ----       | ----       | 0.69858419 | ----       | ----       |
| 73 | ----       | ----       | ----       | 0.56438562 | ----       | ----       |
| 74 | ----       | ----       | ----       | 0.51083347 | ----       | ----       |
| 75 | ----       | ----       | ----       | 0.69645165 | ----       | ----       |
| 76 | ----       | ----       | ----       | 0.39138389 | ----       | ----       |
